# Supplementary material for: Structure–activity relationships of the phosphonate antibiotic dehydrophos
Source: Royal Society of Chemistry journal article supplement (doi:10.1039/c0cc02958k), 2010-01-01
Supplement: c0cc02958k.pdf [file c0cc02958k.pdf]

## Structure-activity relationships of the phosphonate antibiotic dehydrophos

Michael Kuemin<sup>a,b</sup> and Wilfred A. van der Donk<sup>a,b,c,\*</sup>

- [a] Department of Chemistry, University of Illinois at Urbana-Champaign,  
600 S. Mathews Ave., Urbana, IL, 61801, USA.  
Fax: +1(217) 244 8533  
Tel: +1 (217) 244 5360  
E-mail: vddonk@uiuc.edu
- [b] Institute for Genomic Biology, University of Illinois at Urbana-Champaign,  
1206 West Gregory Drive, Urbana, IL, 61801, USA
- [c] Howard Hughes Medical Institute, University of Illinois at Urbana-Champaign,  
1206 West Gregory Drive, Urbana, IL, 61801, USA

### Supporting information

Table of contents:

|                                                                                                                   |     |
|-------------------------------------------------------------------------------------------------------------------|-----|
| General aspects                                                                                                   | S2  |
| Synthesis of dehydrophos ( <b>1</b> ) and its enantiomer ( <b>ent-1</b> )                                         | S3  |
| Synthesis of desmethyl dehydrophos ( <b>2</b> )                                                                   | S4  |
| Synthesis of dimethyl dehydrophos ( <b>3</b> )                                                                    | S15 |
| Synthesis of dehydrophos derivatives <b>4</b> , <b>4b</b> , <b>5</b> , <b>5b</b> , <b>ent-5</b> and <b>ent-5b</b> | S20 |
| Synthesis of serine derivatives <b>6a</b> and <b>6b</b>                                                           | S22 |
| Agar diffusion bioassays                                                                                          | S26 |
| Liquid broth growth inhibition assays                                                                             | S27 |
| References                                                                                                        | S29 |

## General aspects

Materials and reagents were of the highest commercially available grade and used without further purification. Reactions were monitored by thin layer chromatography using Merck silica gel 60 F<sub>254</sub> glass plates. Compounds were visualised by UV, ninhydrin or KMnO<sub>4</sub>. Flash chromatography was performed using Silicycle SilicaFlash<sup>®</sup> P60, particle size 40 - 63 µm. NMR spectra were recorded on a Varian Unity 500, Varian Unity Inova 500 or on a Varian Unit 400 spectrometer. Phosphorus shifts are reported relative to an external standard of 85% phosphoric acid (0.00 ppm). Data are represented as follows: Chemical shift, multiplicity (s = singlet, d = doublet, t = triplet, q = quartet, m = multiplet and/or multiple resonances), integration, assignment. Mass spectrometry was performed by the University of Illinois Mass Spectrometry Center. Reversed phase HPLC analysis was performed on an Agilent 1200 series quad pump system equipped with a diode array detector and a G1956B mass spectrometer with a multimode-electrospray/atmospheric pressure chemical ionization (MM-ES+APCI) source. The flow rate was 0.5 ml/min. The following columns were used: column A: Synergi 4 µ Fusion-RP 80A column (150 x 4.6 mm, 4 µm, Phenomenex Torrance, CA) and column B: Eclipse XDB-C18 5 µ column (4.6 x 150 mm, 5 µm, Agilent). Reversed phase HPLC purification was carried out on a Agilent 1200 series system equipped with a UV absorbance detector (220 nm or 210 nm). The flow rate was 4 ml/min. The following two columns were used: column C: Synergi 4 µ Fusion-RP 80A column (250 x 10 mm, 4 µm, Phenomenex Torrance, CA) and column D: Eclipse XDB-C18 5 µ column (9.4 x 250 mm, 5 µm, Agilent).

### Synthesis of dehydrophos (**1**) and its enantiomer (**ent-1**)

The synthesis of **1** (13 mg) and **ent-1** (38 mg, using H-D-Leu-OMe) was performed according to Whitteck et al.<sup>1</sup> Analytical data are in accordance with the reported data. <sup>1</sup>H NMR spectra are shown below (top **1**, bottom **ent-1**):

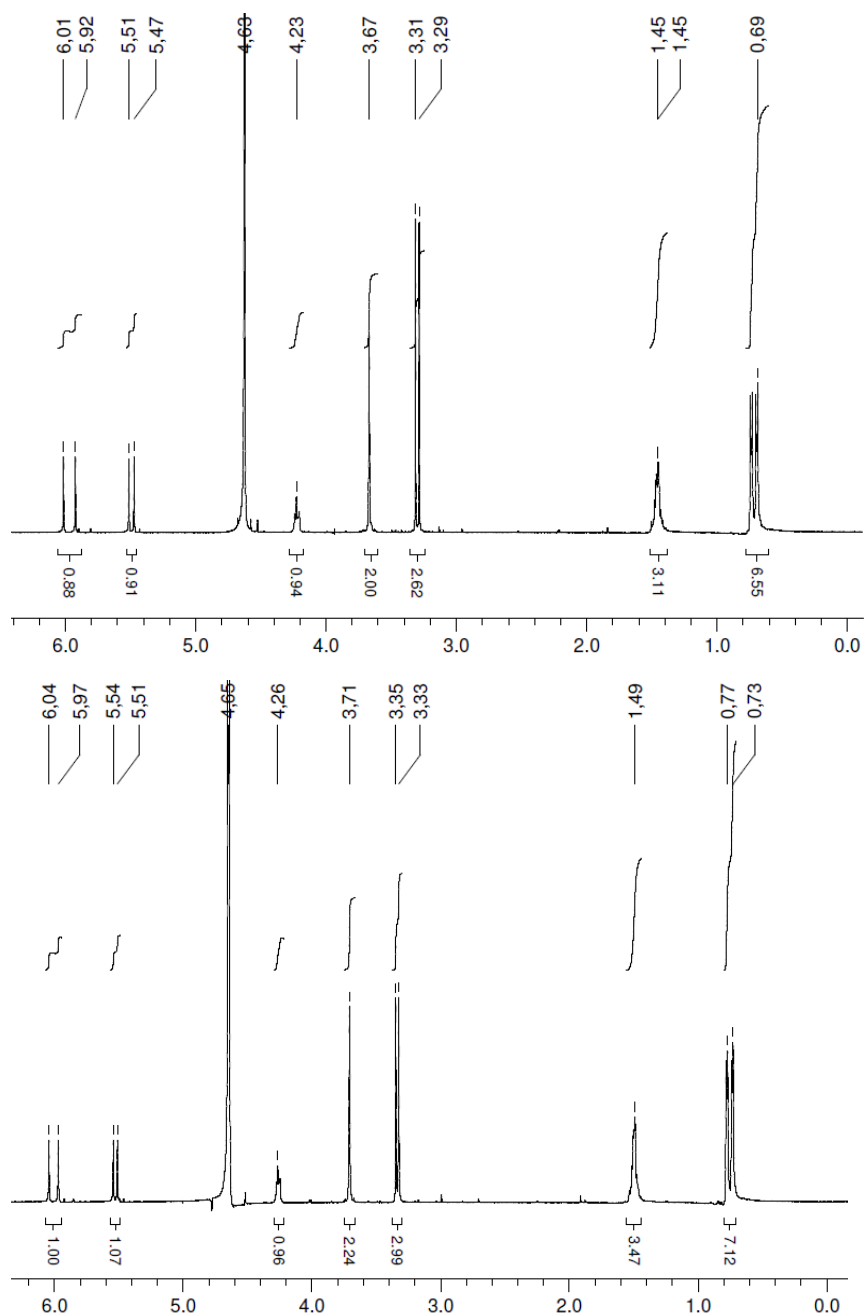

## Synthesis of desmethyl dehydrosphos 2

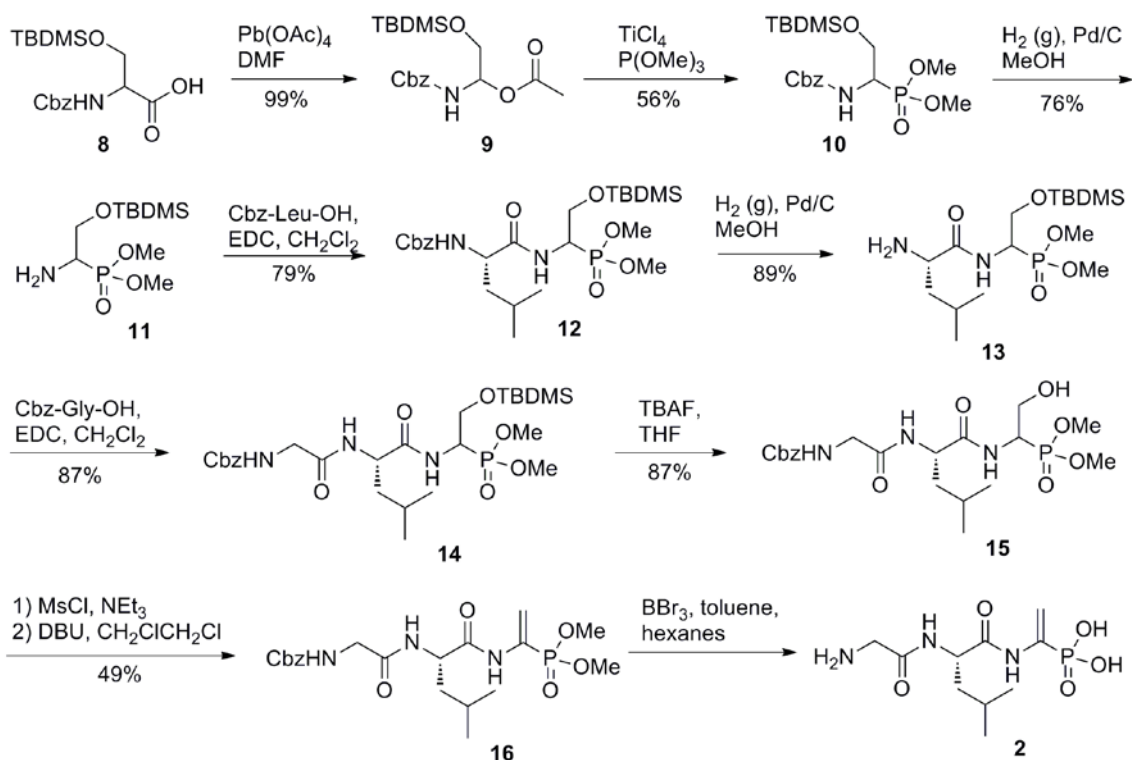

Compound **8** was synthesised from Cbz-Ser-OH according to Luo et al.<sup>2</sup>

### Synthesis of compound **9**<sup>3</sup>

$\text{Pb}(\text{OAc})_4$  (6.88 g, 15.6 mmol) was suspended in DMF (18 ml) and cooled with an ice bath. Then a solution of Cbz-Ser(OTBDMS)-OH (**8**, 4.57 g, 12.9 mmol) in dry DMF (18 ml) was added. After 30 min the cooling bath was removed and the brown suspension turned into a yellow solution. After 3.5 h stirring at 25 °C the reaction was quenched by the addition of saturated aqueous  $\text{NaHCO}_3$  (150 ml) and immediately extracted with EtOAc (4 times 110 ml). The combined organic fractions were washed with sat. aqueous  $\text{NaHCO}_3$  and brine, dried over  $\text{Na}_2\text{SO}_4$ , filtered and evaporated under reduced pressure to obtain **9** as a colourless oil (4.75 g, 12.9 mmol, quantitative yield).  $^1\text{H}$  NMR (400 MHz,  $\text{CDCl}_3$ ):  $\delta$ /ppm = 7.40-7.30 (m, 5H; arom), 6.24 (dt,  $J$  = 9.9 Hz, 2.7 Hz, 1H; CH), 5.89 (d,  $J$  = 8.5 Hz, 1H; NH), 5.20-5.08 (m, 2H;  $\text{CH}_2$ -Bn), 3.87 (bd,  $J$  = 10.5 Hz, 1H;  $\text{CH}_2$ ), 3.78 (dd,  $J$  = 11.6 Hz, 2.8 Hz, 1H;  $\text{CH}_2$ ), 2.95 (s, 3H; Ac), 0.89 (s, 9H;  $\text{C}(\text{CH}_3)_3$ ), 0.06 (s, 3H;  $\text{Si}(\text{CH}_3)_3$ ), 0.05 (s, 3H;  $\text{Si}(\text{CH}_3)_3$ ). MS(ESI):  $m/z$  = 390.3  $[\text{M}+\text{Na}]^+$ , 757.2  $[2\text{M}+\text{Na}]^+$  calculated for  $\text{C}_{18}\text{H}_{29}\text{NO}_5\text{Si}$ .

NMR spectra:

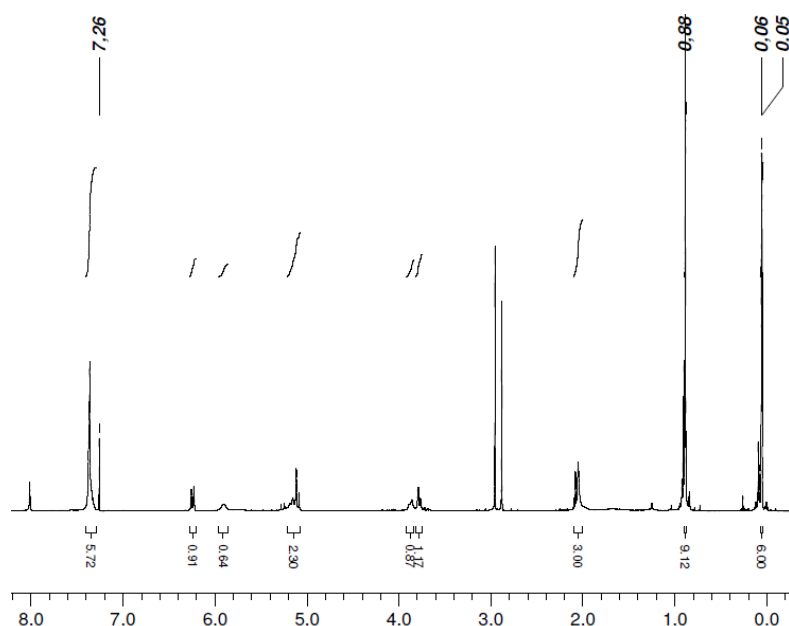

#### *Synthesis of compound 10<sup>t</sup>*

N,O acetal **9** (4.75, 12.9 mmol) was dissolved in 36 ml CH<sub>2</sub>Cl<sub>2</sub>. P(OMe)<sub>3</sub> (2.3 ml, 19.5 mmol) was added and the solution was cooled to -78 °C. After the addition of a 1 M solution of TiCl<sub>4</sub> in CH<sub>2</sub>Cl<sub>2</sub> (14.3 ml, 14.3 mmol) the yellow solution was stirred for 2 h at -87 °C and then allowed to warm to 25 °C over night. The solution was poured into a suspension of Na<sub>2</sub>CO<sub>3</sub> (2.4 g, 22.6 mmol) in CH<sub>2</sub>Cl<sub>2</sub> (62 ml) and H<sub>2</sub>O (4.0 ml, 22.6 mmol) and the mixture was stirred at 25 °C for 30 min and then filtered. The solvent was removed under reduced pressure and the residue was purified by column chromatography (hexane/EtOAc 1:1) to yield racemic **10** as a white solid (3.02 g, 7.24 mmol, 56% yield). <sup>1</sup>H NMR (500 MHz, CDCl<sub>3</sub>): δ/ppm = 7.38-7.29 (m, 5H; arom), 5.27 (d, *J* = 9.7 Hz, 1H; NH), 5.13 (d, *J* = 13 Hz, 1H, Bn CH<sub>2</sub>), 5.10 (d, *J* = 13 Hz, 1H; Bn CH<sub>2</sub>), 4.21 (ddt, *J* = 17.7 Hz, 9.9 Hz, 3.7 Hz, 1H; H<sub>α</sub>), 3.96 (m, 1H; H<sub>β</sub>), 3.86 (ddd, *J* = 24.4 Hz, 10.5 Hz, 3.8 Hz, 1H; H<sub>β</sub>), 3.76 (d, *J* = 11 Hz, 3H, OCH<sub>3</sub>), 3.73 (d, *J* = 10.7 Hz, 3H, OCH<sub>3</sub>), 0.88 (s, 9H; C(CH<sub>3</sub>)<sub>3</sub>), 0.05 (s, 3H; SiCH<sub>3</sub>), 0.05 (s, 3H; SiCH<sub>3</sub>). <sup>13</sup>C NMR (126 MHz, CDCl<sub>3</sub>): δ/ppm = 155.7, 136.1, 128.5, 128.2, 128.1, 67.2, 61.8, 53.0 (d, *J* = 6.5 Hz), 53.9 (d, *J* = 6.3 Hz), 49.5 (d, *J* = 154 Hz), 25.7, 18.2, -5.5, -5.6. <sup>31</sup>P-NMR (202 MHz, CDCl<sub>3</sub>): δ/ppm = 26.7. MS(ESI): *m/z* = 418.3 [M+H]<sup>+</sup> calculated for C<sub>18</sub>H<sub>32</sub>NO<sub>6</sub>PSi.

NMR spectra:

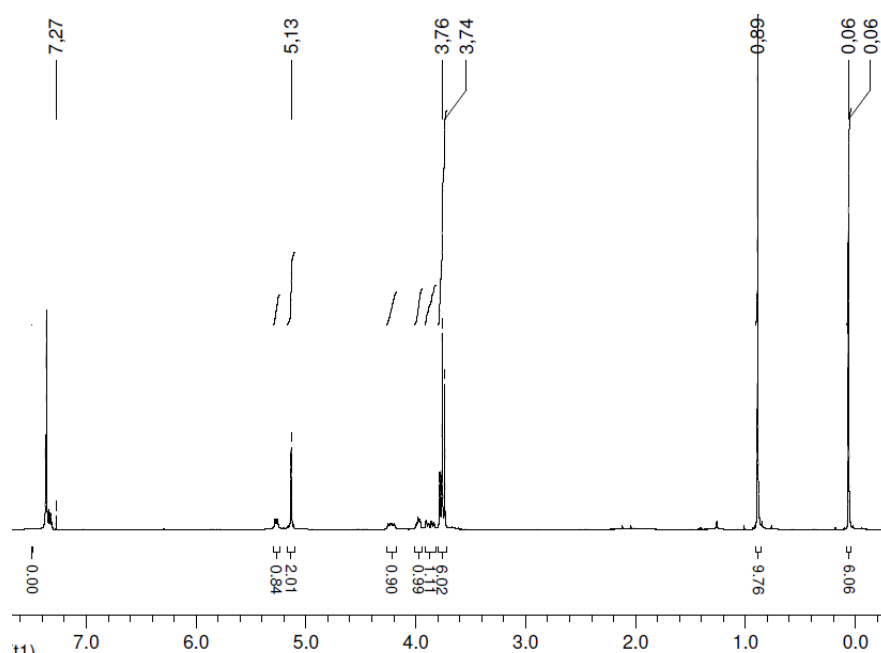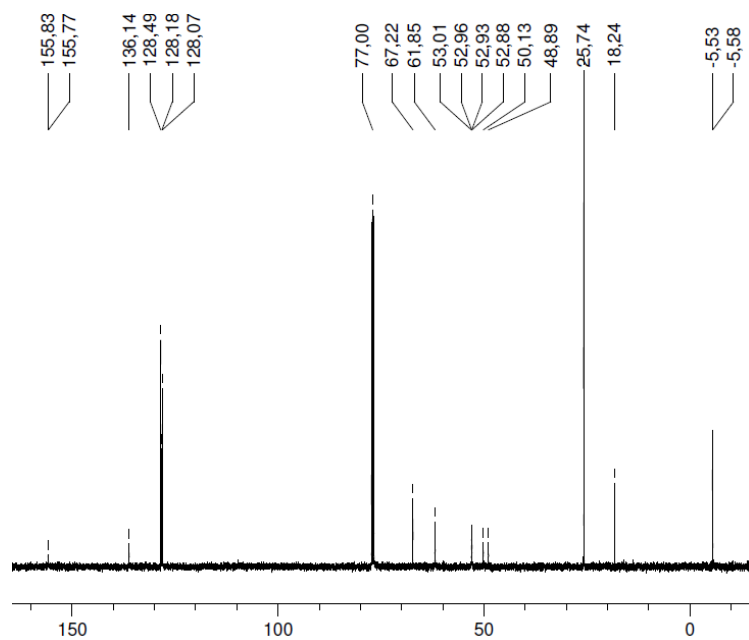

### *Synthesis of compound 11*

Compound **10** (358 mg, 858  $\mu$ mol) was dissolved in MeOH (20 ml). Pd/C (60 mg, 5% Pd) was added and the suspension was vigorously stirred under a hydrogen atmosphere for 3 h at 25  $^{\circ}$ C. The mixture was filtrated over celite and rinsed with MeOH. The solvent was removed under reduced pressure to yield **11** as a clear oil (185 mg, 653  $\mu$ mol, 76% yield).  $^1\text{H}$  NMR (400 MHz,  $\text{CDCl}_3$ ):  $\delta/\text{ppm}$  = 3.86 (ddd,  $J$  = 13.5 Hz, 10.3 Hz, 3.6 Hz,

1H), 3.75 (d,  $J = 10.5$  Hz, 6H; OMe), 3.71 (m, 1H), 3.19 (m, 1H), 0.86 (s, 9H; C(CH<sub>3</sub>)<sub>3</sub>), 0.04 (s, 6H; Si(CH<sub>3</sub>)). <sup>13</sup>C NMR (126 MHz, CDCl<sub>3</sub>):  $\delta$ /ppm = 62.3, 54.0 (d,  $J = 6.9$  Hz), 53.7 (d,  $J = 7.0$  Hz), 51.3 (d,  $J = 151$  Hz). <sup>31</sup>P-NMR (162 MHz, CDCl<sub>3</sub>):  $\delta$ /ppm = 29.9. <sup>13</sup>C NMR (100 MHz, CDCl<sub>3</sub>):  $\delta$ /ppm = 63.5, 52.9 (d,  $J = 7.0$  Hz), 52.8 (d,  $J = 6.9$ ), 51.1 (d,  $J = 152$  Hz), 25.8, 18.3, -5.4. TLC: R<sub>f</sub> = 0.5 (EtOAc/hexane 3:1). MS(ESI):  $m/z$  = 284.3 [M+H]<sup>+</sup>, calculated for C<sub>10</sub>H<sub>26</sub>NO<sub>4</sub>PSi.

NMR Spectra:

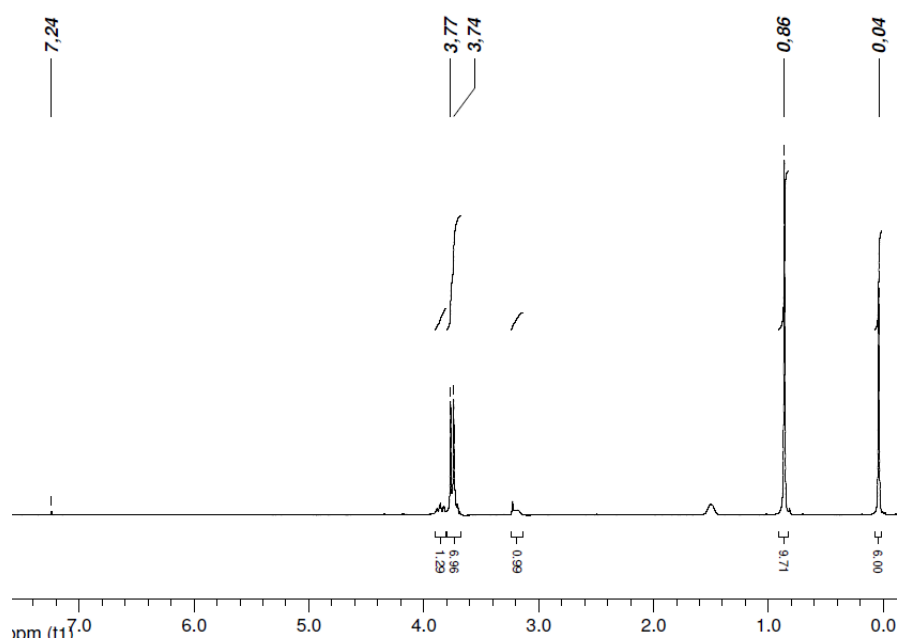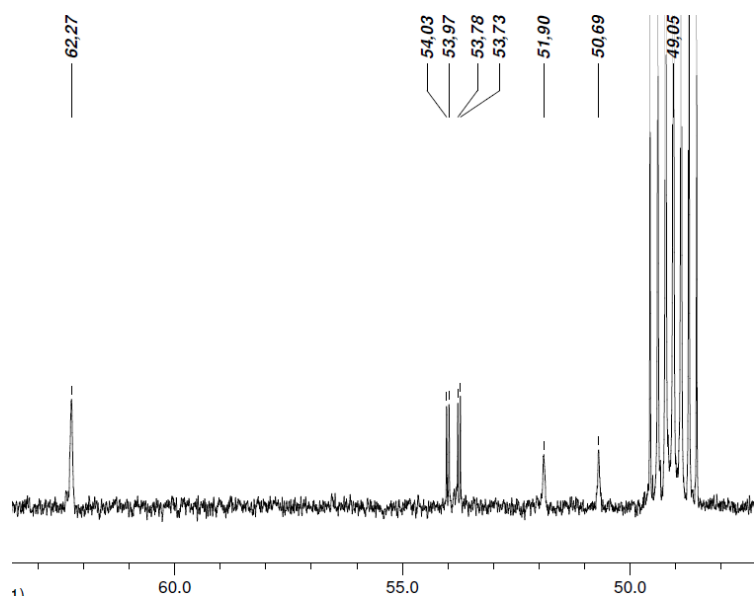

*Synthesis of compound 12*

Amine **11** (185 mg, 653  $\mu$ mol) and Cbz-Leu-OH (260 mg, 0.98 mmol) were dissolved in  $\text{CH}_2\text{Cl}_2$  (1 ml). EDC (188 mg, 984  $\mu$ mol) was added and the solution was stirred for 5 h at 25  $^\circ\text{C}$ . The solution was diluted with  $\text{CH}_2\text{Cl}_2$  and washed with aqueous 5% citric acid and saturated aqueous  $\text{NaHCO}_3$ . The organic layer was dried over  $\text{Na}_2\text{SO}_4$ , filtered and the solvent was removed under reduced pressure. The residue was purified by column chromatography (EtOAc:hexanes 3:1) to yield the protected dipeptide **12** as a clear oil (275 mg, 518  $\mu$ mol, 79% yield). NMR spectra show a mixture of the two diastereoisomers.  $^1\text{H}$  NMR (500 MHz,  $\text{CDCl}_3$ ):  $\delta$ /ppm = 7.38-7.28 (m, 5H; arom), 6.62 and 6.51 (d,  $J$  = 9.2 Hz/9.4 Hz, 1H; NH), 5.28 and 5.19 (d,  $J$  = 8.2 Hz/8.0 Hz, 1H; NH), 5.11 (d,  $J$  = 12.0 Hz, 1H;  $\text{CH}_2$ -Bn), 5.07 (d,  $J$  = 12.1 Hz, 1H;  $\text{CH}_2$ -Bn), 4.56-4.45 (m, 1H), 4.29-4.20 (m, 1H), 4.02-3.94 (m, 1H), 3.87-3.76 (m, 1H), 3.72 (d,  $J$  = 10.8 Hz, 6H; OMe), 1.71-1.62 (m, 2H), 1.55-1.47 (m, 1H), 0.93 (m, 6H;  $\text{H}\delta$  Leu), 0.88 (s, 9H;  $\text{C}(\text{CH}_3)_3$ ), 0.07 and 0.06 (s, 6H;  $\text{Si}(\text{CH}_3)_2$ ).  $^{31}\text{P}$ -NMR (202 MHz,  $\text{CDCl}_3$ ):  $\delta$ /ppm = 26.4 and 26.3.  $^{13}\text{C}$  NMR (126 MHz,  $\text{CDCl}_3$ ):  $\delta$ /ppm = 171.7 (d,  $J$  = 4.7 Hz) and 171.6 (d,  $J$  = 4.8 Hz), 156.0 and 155.9, 136.1, 128.5, 128.2 128.0, 67.0, 61.6 and 61.6, 53.6, 52.9 (d,  $J$  = 6.3 Hz), 52.9 (d,  $J$  = 6.2 Hz), 47.3 (d,  $J$  = 153 Hz) and 47.2 (d,  $J$  = 154 Hz), 41.8 and 41.7, 29.7, 25.7, 24.7 and 24.6, 22.9 and 22.8, 22.0 and 21.9, 18.2, -5.5 and -5.6. TLC:  $R_f$ =0.5 (EtOAc/hexane 3:1). MS(ESI):  $m/z$  = 531.3  $[\text{M}+\text{H}]^+$  calculated for  $\text{C}_{24}\text{H}_{43}\text{N}_2\text{O}_7\text{PSi}$ .

NMR spectra

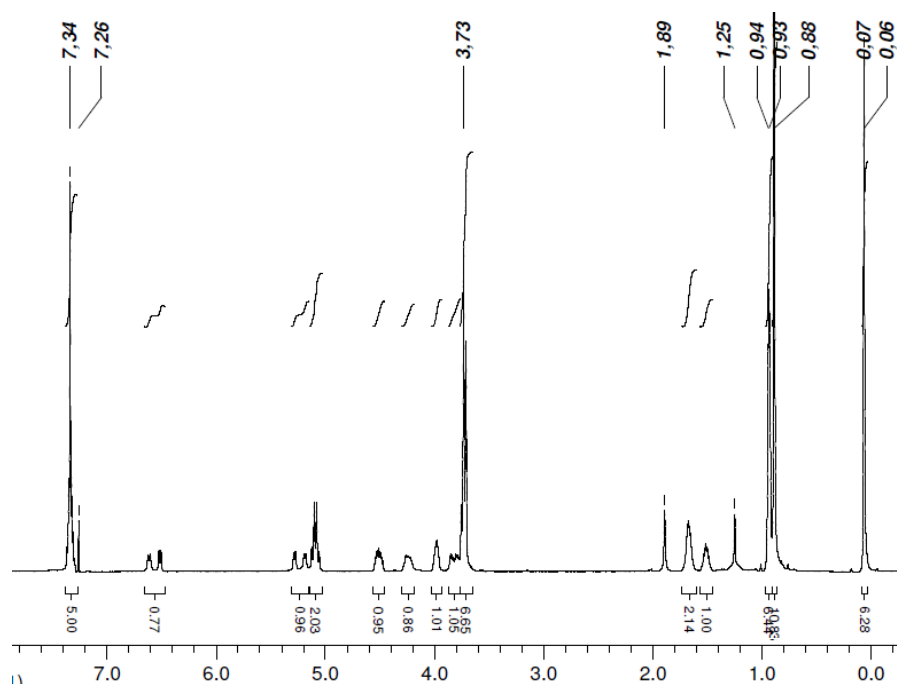

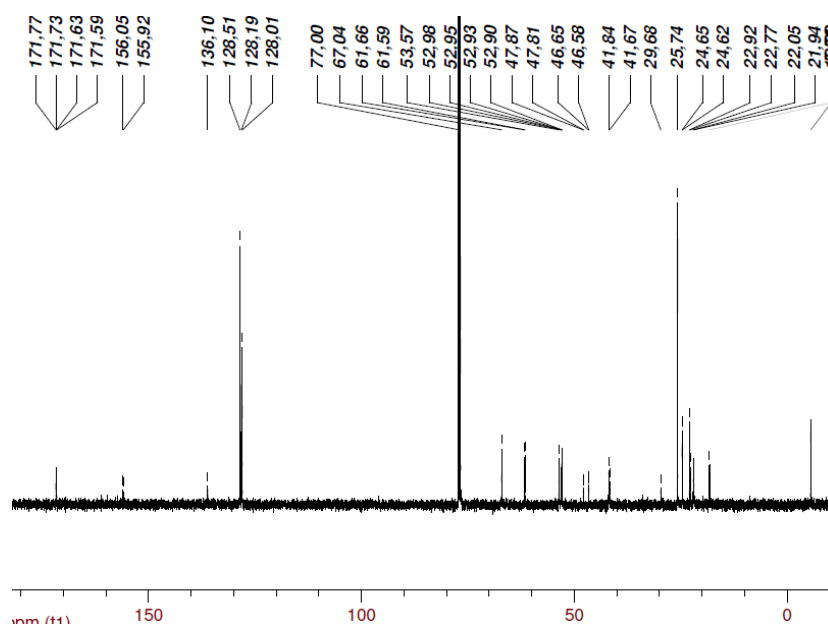

### Synthesis of compound 13

Compound **12** (93 mg, 175  $\mu$ mol) was dissolved in MeOH (6 ml). Pd/C (20 mg, 5% Pd) was added and the suspension was vigorously stirred under a hydrogen atmosphere for 4 h at 25  $^{\circ}$ C. The mixture was filtrated over celite and rinsed with MeOH. The solvent was removed under reduced pressure to yield **13** as a clear oil (62 mg, 156  $\mu$ mol, 89% yield). NMR spectra show a mixture of the two diastereoisomers.  $^1\text{H}$  NMR (500 MHz,  $\text{CD}_3\text{OD}$ ):  $\delta/\text{ppm}$  = 4.54-4.74 (m, 1H), 3.95-3.88 (m, 2H), 3.78 (d,  $J$  = 10.8 Hz, 3H; OMe), 3.77 (d,  $J$  = 10.8 Hz, 3H; OMe), 3.44-3.38 (m, 1H), 1.75 (m, 1H) 1.55 (m, 1H), 1.38 (m, 1H), 0.93-0.97 (m, 6H; H $\delta$  Leu), 0.92 and 0.91 (s, 9H; C(CH $_3$ ) $_3$ ), 0.11 and 0.10 (s, 6H; Si(CH $_3$ ) $_2$ ).  $^{13}\text{C}$  NMR (126 MHz,  $\text{CD}_3\text{OD}$ ): signal-to-noise insufficient to observe the carbonyl resonance  $\delta/\text{ppm}$  = 62.8, 54.4, 53.9 (d), 52.8 (d), -, 45.6, 26.3, 25.7, 23.6 and 23.5, 22.5 and 22.4, 19.2 and 19.2, -5.3.  $^{31}\text{P}$ -NMR (202 MHz,  $\text{CD}_3\text{OD}$ ):  $\delta/\text{ppm}$  = 26.8 and 26.6. MS(ESI):  $m/z$  = 397.4  $[\text{M}+\text{H}]^+$  calculated for  $\text{C}_{16}\text{H}_{37}\text{N}_2\text{O}_5\text{PSi}$ .

NMR spectra:

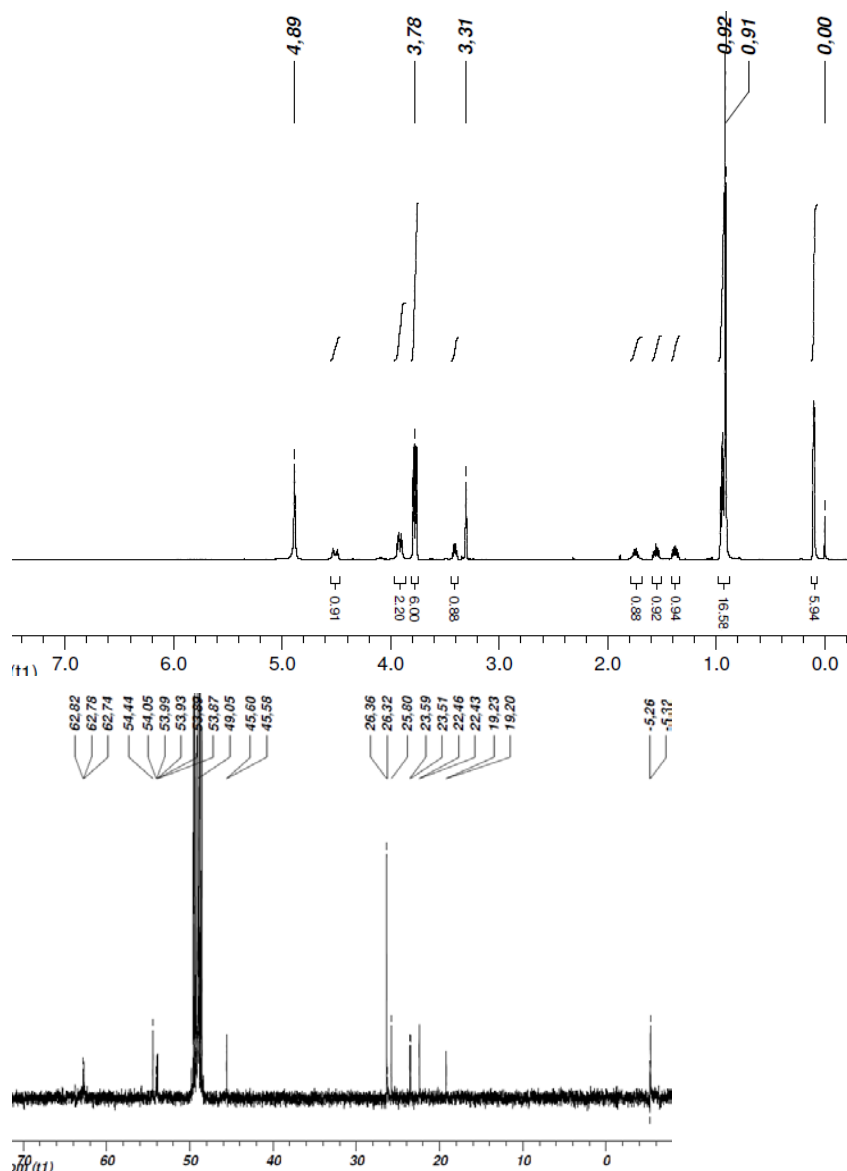

### Synthesis of compound **14**

Amine **13** (62 mg, 156  $\mu$ mol) and Cbz-Gly-OH (50 mg, 239  $\mu$ mol) were dissolved in CH<sub>2</sub>Cl<sub>2</sub> (0.5 ml). EDC (45 mg, 235  $\mu$ mol) was added and the solution was stirred over night at 25 °C. The solution was diluted with CH<sub>2</sub>Cl<sub>2</sub> and washed with aqueous 5% citric acid, saturated aqueous NaHCO<sub>3</sub> and brine. The organic layer was dried over Na<sub>2</sub>SO<sub>4</sub>, filtered and the solvent was removed under reduced pressure. The residue was purified by column chromatography (4% MeOH in CH<sub>2</sub>Cl<sub>2</sub>) to yield the protected tripeptide **14** as clear oil (80 mg, 136  $\mu$ mol, 87% yield). NMR spectra show a mixture of the two diastereoisomers. <sup>1</sup>H NMR (500 MHz, CDCl<sub>3</sub>):  $\delta$ /ppm = 7.38-7.27 (m, 5H; arom), 6.85 (m, 1H; NH), 6.74 (m, 1H; NH), 5.74 and 5.64 (m, 1H; NH), 5.11 (s, 2H; CH<sub>2</sub>-Bn), 4.58-

4-44 (m, 2H), 3.97-3.67 (m, 10H), 1.69-1.47 (m, 3H), 0.95-0.83 (m, 6H, H $\delta$  Leu), 0.88 and 0.87 (s, 9H; C(CH<sub>3</sub>)<sub>3</sub>), 0.06 and 0.05 (s, 6H; Si(CH<sub>3</sub>)<sub>2</sub>). <sup>31</sup>P-NMR (202 MHz, CDCl<sub>3</sub>):  $\delta$ /ppm = 26.4 and 26.0. <sup>13</sup>C NMR (126 MHz, CDCl<sub>3</sub>):  $\delta$ /ppm = 171.6 (d, *J* = 4.7 Hz) and 171.4 (d, *J* = 4.9 Hz), 169.1 and 168.7, 156.0, 136.1, 128.5, 128.2, 128.1, 67.2 and 67.1, 61.6 and 61.5, 53.4, 53.2 (d, *J* = 6.7 Hz), 53.0 (d, *J* = 6.6 Hz), 51.8 and 51.5, 47.5 (d, *J* = 154 Hz) and 47.3 (d, *J* = 154 Hz), 44.2, 41.4 and 41.2, 25.7, 24.7 and 24.6, 22.8 and 22.7, 22.2 and 22.1, 18.2, -5.6 and -5.6. TLC: R<sub>f</sub> = 0.4 (5% MeOH in CH<sub>2</sub>Cl<sub>2</sub>). MS(ESI): *m/z* = 588.4 [M+H]<sup>+</sup>, 610.4 [M+Na]<sup>+</sup>, 626.3 [M+K]<sup>+</sup>, calculated for C<sub>26</sub>H<sub>46</sub>N<sub>3</sub>O<sub>8</sub>PSi.

NMR spectra:

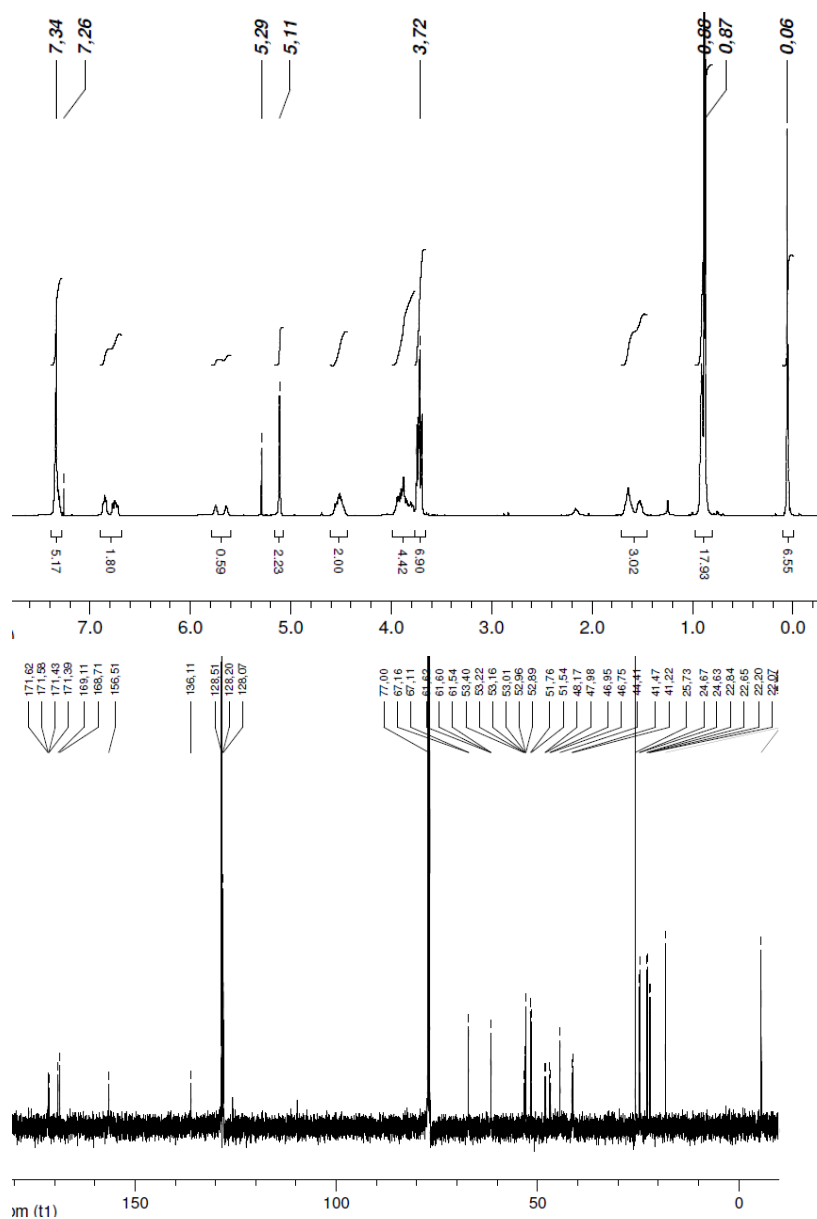

### Synthesis of compound **15**

The TBDMS protected precursor **14** (251 mg, 427  $\mu\text{mol}$ ) was dissolved in a 1 M solution of TBAF in THF (900  $\mu\text{l}$ , 900  $\mu\text{mol}$ ). The yellow solution was stirred at 25  $^{\circ}\text{C}$  for 30 min, diluted with  $\text{CH}_2\text{Cl}_2$  (20 ml) and washed with a 0.1 M aqueous HCl solution. The organic fraction was dried over  $\text{Na}_2\text{SO}_4$ , filtered and the solvent was removed under reduced pressure. The residue was subjected to column chromatography (3% MeOH to 5% MeOH in  $\text{CH}_2\text{Cl}_2$ ) to yield **15** (148 mg, 313  $\mu\text{mol}$ , 73% yield) as a slightly yellow solid. NMR spectra show a mixture ( $\sim 1:1$ ) of diastereoisomers.  $^1\text{H}$  NMR (500 MHz,  $\text{CDCl}_3$ ):  $\delta/\text{ppm}$  = 7.75 (d,  $J$  = 9.2 Hz,  $\frac{1}{2}$  H; NH), 7.53 (d,  $J$  = 9.4 Hz,  $\frac{1}{2}$  H; NH), 7.36-7.26 (m, 5H; Ph), 7.18 (d,  $J$  = 7.9 Hz,  $\frac{1}{2}$  H; NH), 7.13 (d,  $J$  = 7.4 Hz,  $\frac{1}{2}$  H; NH), 6.11 (s,  $\frac{1}{2}$  H; NH), 5.91 (s,  $\frac{1}{2}$  H; NH), 5.09 (s, 2H;  $\text{CH}_2\text{-Bn}$ ), 4.68-4.47 (m, 2H), 3.95-3.65 (m, 10H), 1.70-1.51 (m, 3H;  $\text{H}\gamma/\beta$  Leu), 0.95-0.82 (m, 6H;  $\text{H}\delta$  Leu).  $^{13}\text{C}$  NMR (126 MHz,  $\text{CDCl}_3$ ) signal-to-noise insufficient to observe the carbonyl resonances:  $\delta/\text{ppm}$  = 136.0, 128.5, 128.2, 128.1, 67.3/67.2, 61.4/60.9, 53.7, 53.0, 52.0, 47.6 (d,  $J$  = 154 Hz), 44.3/44.3, 41.0/41.7, 24.8/24.7, 22.9/22.7, 21.8.  $^{31}\text{P}$ -NMR (202 MHz,  $\text{CDCl}_3$ ):  $\delta/\text{ppm}$  = 26.3 and 26.2. MS(ESI):  $m/z$  = 474.3  $[\text{M}+\text{H}]^+$  calculated for  $\text{C}_{20}\text{H}_{32}\text{N}_3\text{O}_8\text{P}$ .

NMR spectra:

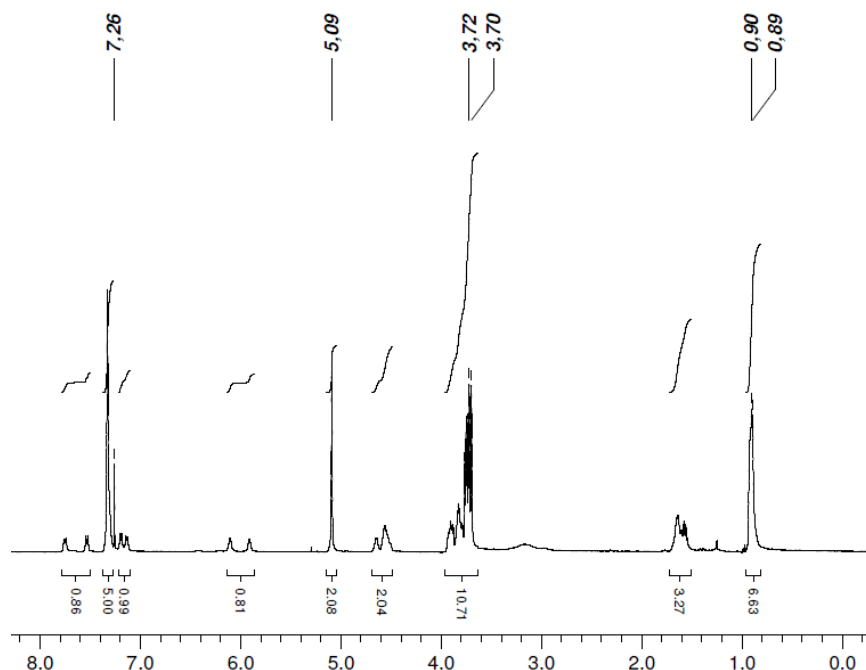

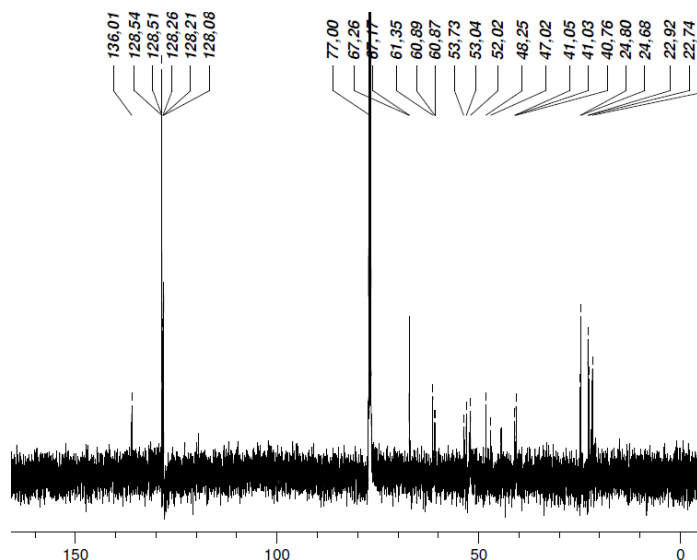

### *Synthesis of compound 16*

The alcohol **15** (111 mg, 234  $\mu\text{mol}$ ) was dissolved in dry  $\text{CH}_2\text{Cl}_2$  (1 ml).  $\text{NEt}_3$  (65  $\mu\text{l}$ , 466  $\mu\text{mol}$ ) and  $\text{MsCl}$  (37  $\mu\text{l}$ , 478  $\mu\text{mol}$ ) were added at 0  $^\circ\text{C}$  and the solution was stirred at 25  $^\circ\text{C}$  for 45 min. The solvent was removed under reduced pressure and the mesylated alcohol was dissolved in 1,2-dichloroethane (3 ml) without purification. DBU (89  $\mu\text{l}$ , 596  $\mu\text{mol}$ ) was added and the solution was heated to reflux for 30 min. The solvent was removed under reduced pressure and the residue was dissolved in  $\text{CH}_2\text{Cl}_2$  and washed with 0.1 M aqueous  $\text{HCl}$  (5 ml). The combined organic phases were dried over  $\text{Na}_2\text{SO}_4$ , filtered, concentrated in vacuo and purified by column chromatography ( $\text{EtOAc}$ ) to yield **16** (52 mg, 114  $\mu\text{mol}$ , 49% yield) as an oil. The analytical data are in agreement with the corresponding intermediate in the original synthesis of dehydrophos.<sup>1</sup>

### *Synthesis of compound 2*

The protected precursor **16** (52 mg, 114  $\mu\text{mol}$ ) was dissolved in toluene (1.8 ml) and cooled to 0  $^\circ\text{C}$ . A 1 M solution of  $\text{BBr}_3$  in hexanes (342  $\mu\text{l}$ , 342  $\mu\text{mol}$ ) was added drop wise whereupon a yellow precipitate was formed. The mixture was kept at 70  $^\circ\text{C}$  for 4 h. At 25  $^\circ\text{C}$   $\text{MeOH}$  (2 ml) was added forming a yellow solution. All volatiles were removed under reduced pressure and the residue was taken up in  $\text{H}_2\text{O}$  (4 ml) and washed twice with  $\text{EtOAc}$  (3 ml). The aqueous phase was lyophilized. The resulting brown solid was purified by preparative reversed phase HPLC (column C: linear gradient of 0%  $\text{MeOH}$  to 5%  $\text{CH}_3\text{CN}$  in 20 min, the other solvent being 0.1% formic acid in  $\text{H}_2\text{O}$ ) to yield **2** ( $t_R =$

17 min) as a white solid (3 mg) after lyophilisation.  $^1\text{H}$  NMR (500 MHz,  $\text{D}_2\text{O}$ ):  $\delta/\text{ppm}$  = 5.88 (d,  $J$  = 35.7 Hz, 1H; =CH<sub>2</sub>), 5.44 (d,  $J$  = 16.1 Hz, 1H; =CH<sub>2</sub>), 4.26 (m, 1H; H $\alpha$  Leu), 3.73 (d,  $J$  = 16.7 Hz, 1H; H $\alpha$  Gly), 3.69 (d,  $J$  = 16.6 Hz, 1H; H $\alpha$  Gly), 1.55-1.46 (m, 3H; H $\gamma$ / $\beta$  Leu), 0.77 (d,  $J$  = 4.9 Hz, 3H; H $\delta$  Leu), 0.73 (d,  $J$  = 5.0 Hz, 3H; H $\delta$  Leu).  $^{31}\text{P}$ -NMR (202 MHz,  $\text{D}_2\text{O}$ ):  $\delta/\text{ppm}$  = 6.8.  $^{13}\text{C}$  NMR (126 MHz,  $\text{D}_2\text{O}$ ):  $\delta/\text{ppm}$  = 173.7, 167.4, 136.7 (d,  $J$  = 129 Hz), 114.1 (d,  $J$  = 12 Hz), 53.6, 40.4, 39.7, 24.5, 22.3, 20.7. LC-MS (column A):  $t_{\text{R}}$  = 12.8 min (isocratic 0.1% formic acid). HRMS (ESI):  $m/z$  = 294.1213 calculated for  $\text{C}_{10}\text{H}_{21}\text{N}_3\text{O}_5\text{P}^+$ , found: 294.1212.

$^1\text{H}$  NMR spectra:

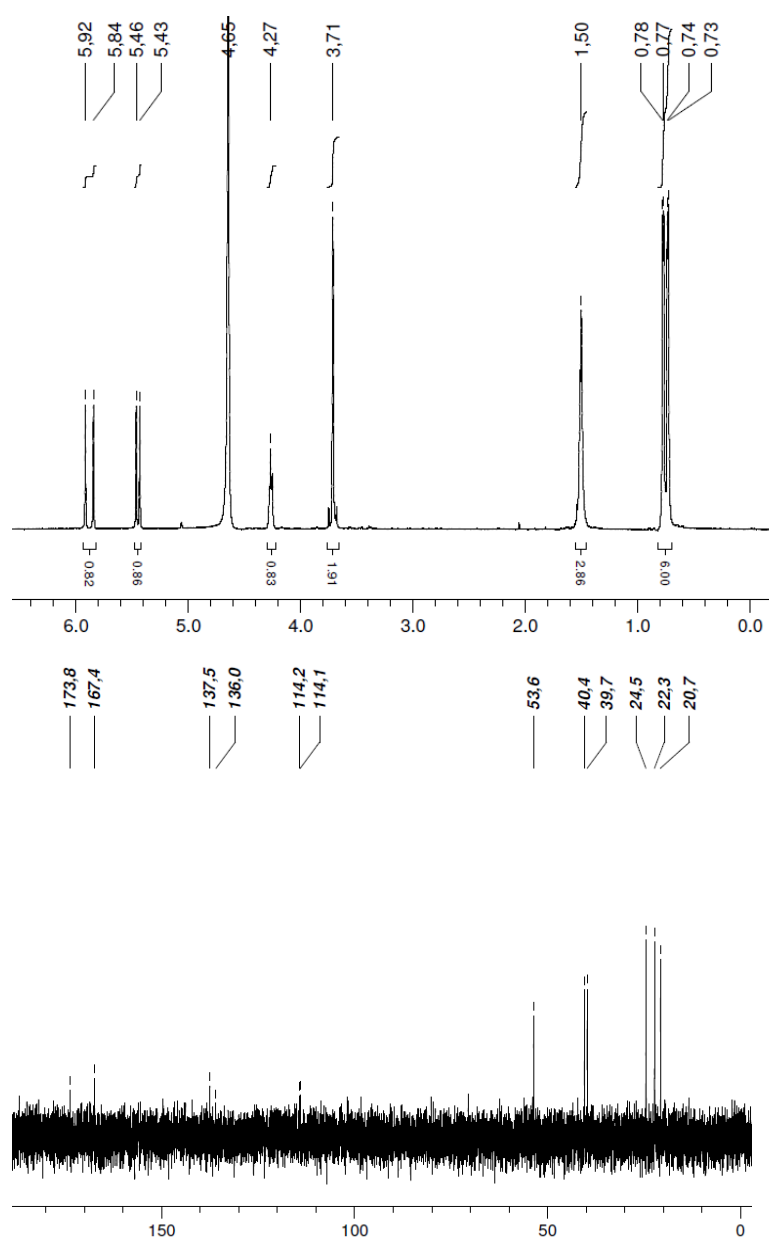

### Synthesis of dimethyldehydrophos 3

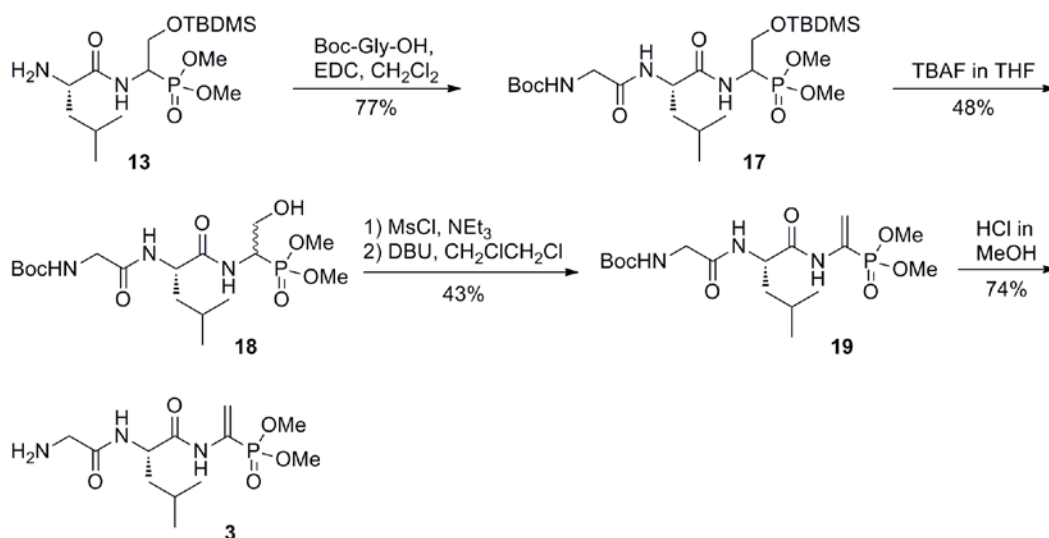

### Synthesis of compound 17

EDC (108 mg, 563  $\mu$ mol) was added to a mixture of amine **13** (148 mg, 374  $\mu$ mol), Boc-Gly-OH (98 mg, 560  $\mu$ mol) and CH<sub>2</sub>Cl<sub>2</sub> (2 ml). The solution was stirred at 25 °C over night, diluted with CH<sub>2</sub>Cl<sub>2</sub> and washed with aqueous 5% citric acid, saturated aqueous NaHCO<sub>3</sub> and brine. The organic layer was dried over Na<sub>2</sub>SO<sub>4</sub>, filtered and the solvent was removed under reduced pressure. The residue was purified by column chromatography (3% MeOH in CH<sub>2</sub>Cl<sub>2</sub>) to yield **17** as an oil (160 mg, 289  $\mu$ mol, 77% yield). <sup>1</sup>H NMR (500 MHz, CDCl<sub>3</sub>):  $\delta$ /ppm = 6.53 (d, *J* = 7.0 Hz, 1 H; NH), 6.48 (d, *J* = 7.9 Hz, 1 H; NH), 5.15 and 5.09 (m, 1 H; NH), 4.54-4.44 (m, 2H), 4.02-3.95 (m, 1H), 3.88-3.73 (m, 9H), 1.71-1.52 (m, 3H), 1.45 (s, 9H; Boc), 0.96-0.91 (m, 6H; H $\delta$  Leu), 0.90 and 0.90 (s, 9H), 0.08 (s, 6H). <sup>31</sup>P-NMR (202 MHz, CDCl<sub>3</sub>):  $\delta$ /ppm = 26.4 and 26.3. MS(ESI): *m/z* = 554.4 [M+H]<sup>+</sup> calculated for C<sub>23</sub>H<sub>48</sub>N<sub>3</sub>O<sub>8</sub>PSi

NMR spectra:

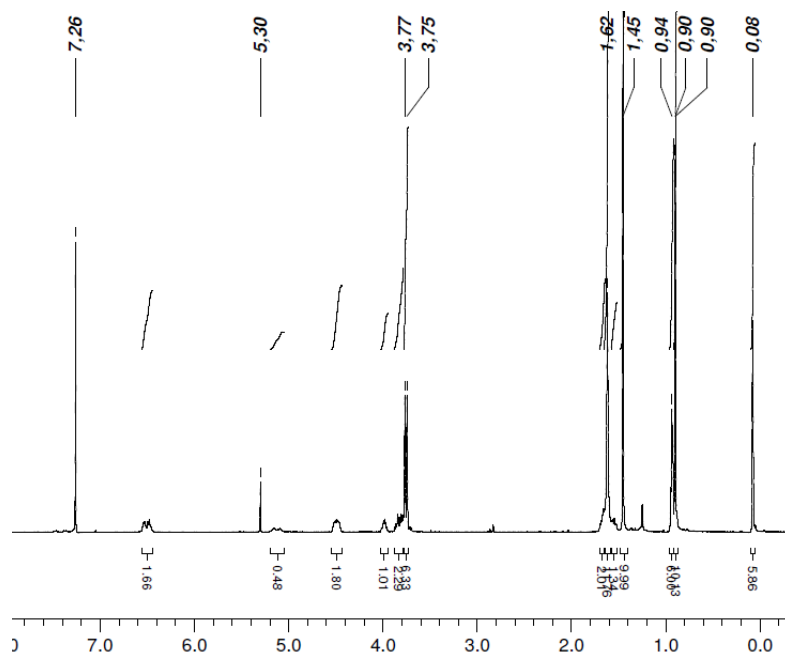

### *Synthesis of compound 18*

Compound **17** (160 mg, 289  $\mu\text{mol}$ ) was dissolved in a 1 M solution of TBAF in THF (0.6 ml, 600  $\mu\text{mol}$ ). The solution was stirred at 25  $^{\circ}\text{C}$  for 1 h. The solution was diluted with  $\text{CH}_2\text{Cl}_2$  and washed with 0.1 M aqueous HCl. The organic fraction was dried over  $\text{Na}_2\text{SO}_4$ , filtered and the solvent was removed under reduced pressure. The remaining oil was purified by column chromatography (4% MeOH in  $\text{CH}_2\text{Cl}_2$ ) to yield **18** (61 mg, 140  $\mu\text{mol}$ , 48% yield) as a mixture of diastereomers ( $\sim 1:1$ ).  $^1\text{H}$  NMR (500 MHz,  $\text{CDCl}_3$ ):  $\delta/\text{ppm}$  = 7.07-6.98 (m, 1 H; NH), 6.73-6.61 (m, 1 H; NH), 5.28-5.23 (m, 1 H; NH), 4.55-4.46 (m, 2H), 4.02-3.91 (m, 1H), 3.89-3.77 (m, 9H), 1.76-1.56 (m, 3H), 1.47 and 1.46 (s, 9H; Boc), 0.97-0.92 (m, 6H;  $\text{H}\delta$  Leu).  $^{31}\text{P}$ -NMR (202 MHz,  $\text{CDCl}_3$ ):  $\delta/\text{ppm}$  = 26.5 and 26.4. MS(ESI):  $m/z$  = 440.4  $[\text{M}+\text{H}]^+$  calculated for  $\text{C}_{17}\text{H}_{34}\text{N}_3\text{O}_8\text{P}$ .

NMR spectra:

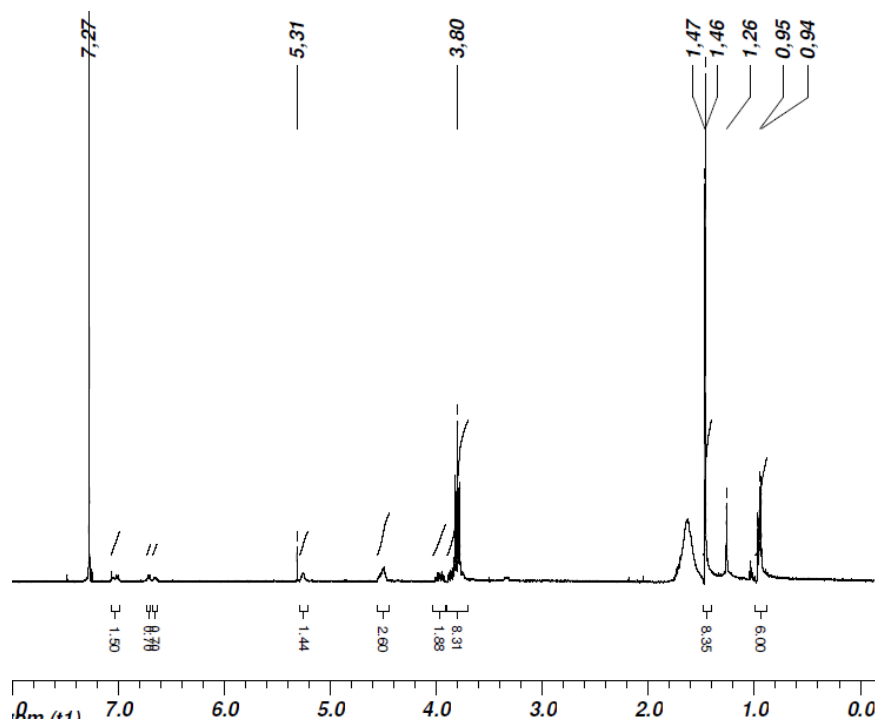

### Synthesis of compound **19**

The alcohol **18** (60 mg, 137  $\mu$ mol) was dissolved in dry  $\text{CH}_2\text{Cl}_2$ .  $\text{NEt}_3$  (38  $\mu$ l, 272  $\mu$ mol) and  $\text{MsCl}$  (21  $\mu$ l, 271  $\mu$ mol) were added at 0  $^\circ\text{C}$ . The solution was stirred at 25  $^\circ\text{C}$  for 40 min. Then the solution was diluted with  $\text{CH}_2\text{Cl}_2$  and washed with water. The organic phase was dried over  $\text{Na}_2\text{SO}_4$ , filtered and the solvent was removed under reduced pressure. The residue was dissolved in 1,2-dichloroethane (0.5 ml) treated with DBU (51  $\mu$ l, 342  $\mu$ mol). After heating to reflux for 1 h, the solution was diluted with  $\text{CH}_2\text{Cl}_2$  and washed with 0.2 M aqueous  $\text{HCl}$ . The organic phase was dried over  $\text{Na}_2\text{SO}_4$ , filtered and the solvent was removed under reduced pressure. The residue was purified by column chromatography ( $\text{EtOAc}$ ) to yield **19** (25 mg, 59  $\mu$ mol, 43% yield) as an oil.  $^1\text{H}$  NMR (400 MHz,  $\text{CDCl}_3$ ):  $\delta/\text{ppm}$  = 7.96 (d,  $J$  = 6.9 Hz, 1 H; NH), 6.69 (s, 1 H; NH), 6.64 (d,  $J$  = 41.8 Hz, 1H;  $=\text{CH}_2$ ), 5.63 (d,  $J$  = 19.1 Hz, 1H;  $=\text{CH}_2$ ), 5.26 (t,  $J$  = 5.2 Hz, 1 H; NH), 4.55-4.46 (m, 1H;  $\text{H}_\alpha$  Leu), 3.90-3.76 (m, 2H;  $\text{H}_\alpha$  Gly), 3.77 (d,  $J$  = 11.2 Hz, 3H; OMe), 3.76 (d,  $J$  = 11.2 Hz, 3H; OMe), 1.75-1.54 (m, 3H;  $\text{H}_\gamma/\beta$  Leu), 1.45 (s, 9H; Boc), 0.96-0.89 (m, 6H;  $\text{H}_\delta$  Leu).  $^{31}\text{P}$ -NMR (162 MHz,  $\text{CDCl}_3$ ):  $\delta/\text{ppm}$  = 15.7. MS(ESI):  $m/z$  = 422.4  $[\text{M}+\text{H}]^+$  calculated for  $\text{C}_{17}\text{H}_{32}\text{N}_3\text{O}_7\text{P}$ .

NMR spectra:

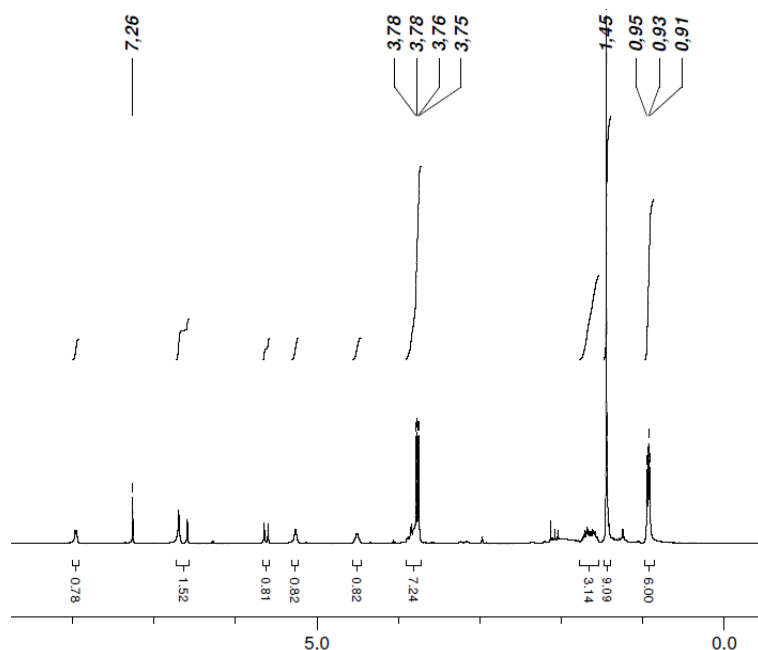

### *Synthesis of compound 3*

Compound **19** (19 mg, 45  $\mu$ mol) was dissolved in a 1.25 M solution of HCl in MeOH (200  $\mu$ l, 250  $\mu$ mol) and stirred under reflux for 30 min. The solvent was removed under reduced pressure and the resulting HCl salt (12 mg) was purified by preparative reversed phase HPLC (column C: linear gradient of 0% MeOH to 80% MeOH in 50 min, the other solvent being 0.1% formic acid in H<sub>2</sub>O) to yield **3** as an oil ( $t_R$  = 15 min, 5 mg) after lyophilisation. <sup>1</sup>H NMR (500 MHz, D<sub>2</sub>O):  $\delta$ /ppm = 6.11 (d,  $J$  = 41.3 Hz, 1H; =CH<sub>2</sub>), 5.96 (d,  $J$  = 16.1 Hz, 1H; =CH<sub>2</sub>), 4.28 (dd,  $J$  = 8.7 Hz, 5.6 Hz, 1H; H $\alpha$  Leu), 3.71 (s, 2H; H $\alpha$  Gly), 3.65 (d,  $J$  = 11.3 Hz, 3H; OCH<sub>3</sub>), 3.64 (d,  $J$  = 11.3 Hz, 3H; OCH<sub>3</sub>), 1.57-1.43 (m, 3H; H $\beta$ / $\gamma$  Leu), 0.79 (d,  $J$  = 5.7 Hz, 3H; H $\delta$  Leu), 0.76 (d,  $J$  = 5.8 Hz, 3H; H $\delta$  Leu). <sup>31</sup>P-NMR (202 MHz, D<sub>2</sub>O):  $\delta$ /ppm = 17.0. <sup>13</sup>C NMR (126 MHz, D<sub>2</sub>O):  $\delta$ /ppm = 174.2, 167.1, 129.4 (d,  $J$  = 209.3 Hz), 127.7 (d,  $J$  = 17.3 Hz), 54.0 (d,  $J$  = 5.3 Hz), 54.0 (d,  $J$  = 4.8 Hz), 52.9, 40.4, 40.0, 24.5, 22.1, 21.0. LC-MS (column A):  $t_R$  = 16.6 min (linear gradient with 0% MeOH to 30% MeOH in 20 minutes, the other solvent being 0.1% formic acid in D<sub>2</sub>O). HRMS (ESI):  $m/z$  = 322.1526 calc for C<sub>12</sub>H<sub>25</sub>N<sub>3</sub>O<sub>5</sub>P<sup>+</sup>, found: 322.1525.

NMR spectra:

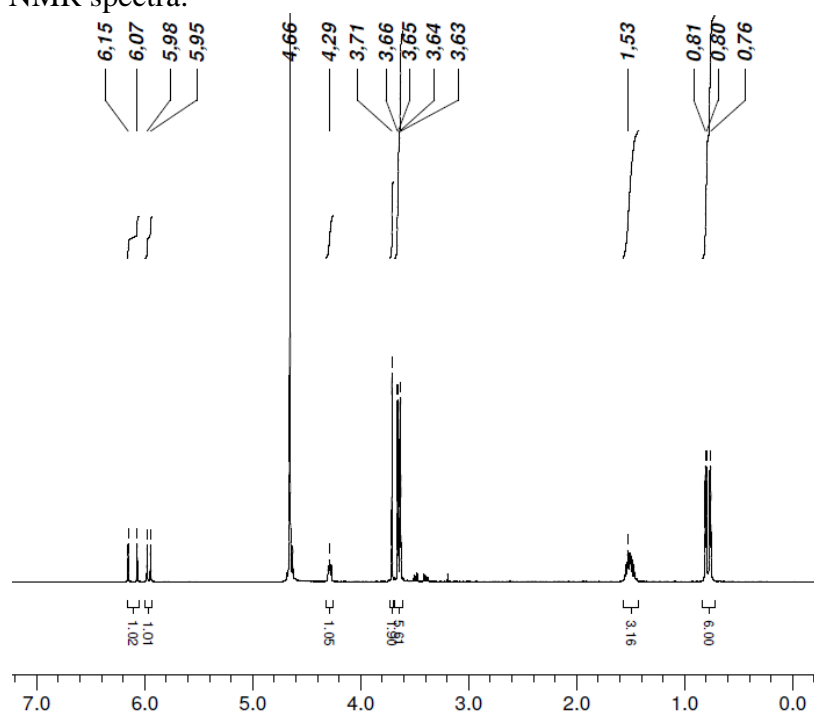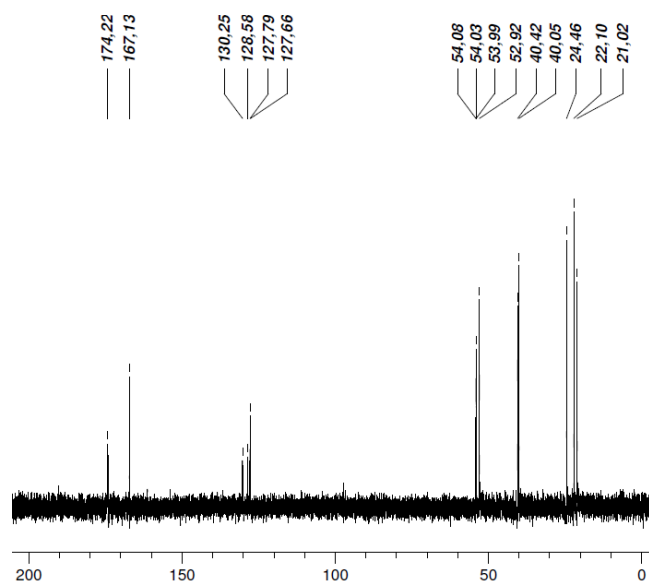

### Synthesis of dehydrophos derivatives **4**, **4b**, **5**, **5b**, **ent-5** and **ent-5b**

The synthesis of **4**, **4b**, **5**, **5b**, **ent-5** and **ent-5b** was performed according to Lee et al.

Analytical data for **4**, **4b**, **5** and **5b** are presented there.<sup>5</sup>

NMR spectra of **ent-5**:

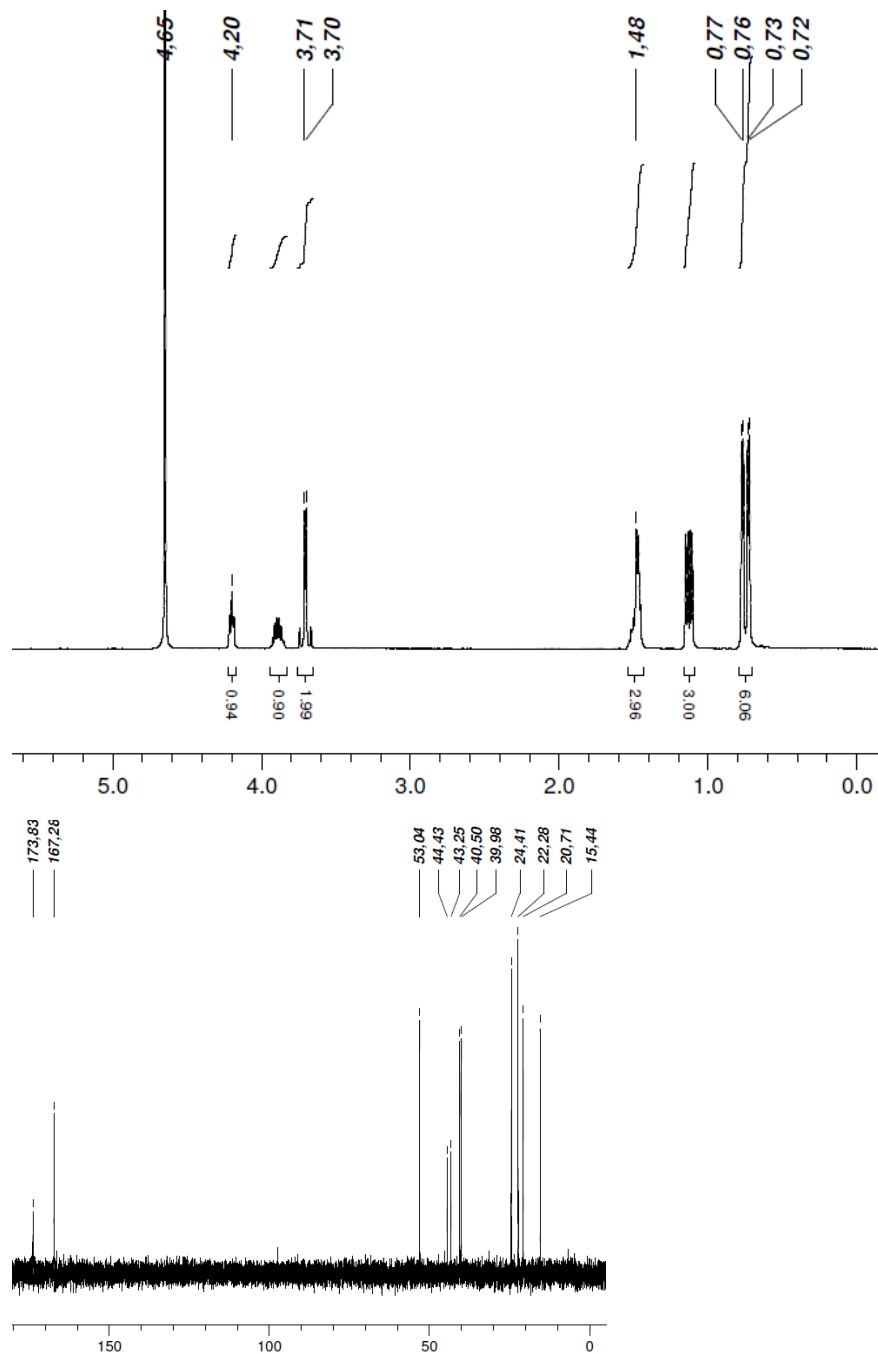

NMR spectra of **ent-5b**:

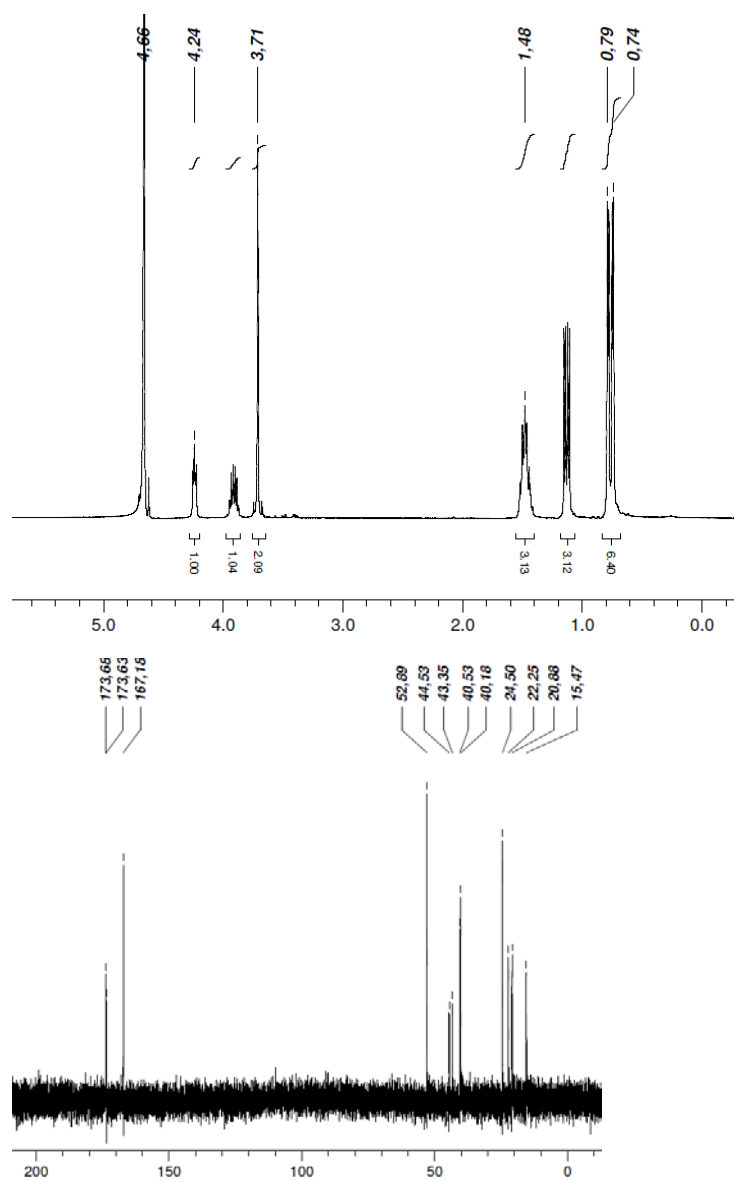

**Synthesis of serine derivatives 6a and 6b** (epimers at the carbon alpha to the methyl phosphonate)

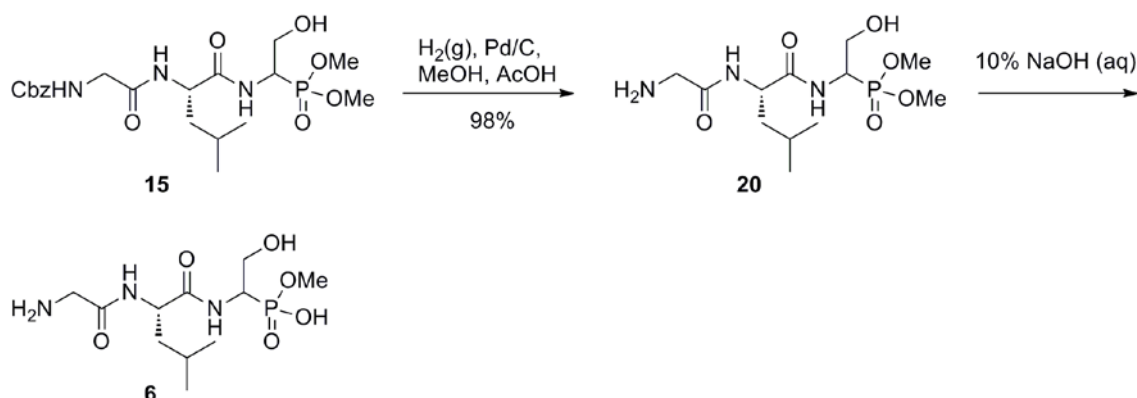

*Synthesis of compound 20*

The Cbz protected compound **15** (100 mg, 211  $\mu\text{mol}$ ) was dissolved in MeOH (4 ml). Pd/C (20 mg, 5% Pd) and AcOH (24  $\mu\text{l}$ , 420  $\mu\text{mol}$ ) were added and the suspension was vigorously stirred under a hydrogen atmosphere for 3 h at 25 °C. The mixture was filtered over celite and rinsed with MeOH. The solvent was removed under reduced pressure to yield the acetate salt of **20** as an oil (83 mg, 208  $\mu\text{mol}$ , 98% yield). NMR spectra showed a mixture (~1:1) of diastereomers.  $^1\text{H}$  NMR (500 MHz,  $\text{CD}_3\text{OD}$ ):  $\delta/\text{ppm}$  = 4.54-4.44 (m, 2H), 3.87-3.75 (m, 8H), 3.65 (s, 2H), 1.93 (s, 3H,  $\text{CH}_3\text{COOH}$ ), 1.75-1.57 (m, 3H;  $\text{H}\gamma/\beta$  Leu), 0.99-0.93 (m, 6H;  $\text{H}\delta$  Leu).  $^{13}\text{C}$  NMR (126 MHz,  $\text{CD}_3\text{OD}$ ) signal-to-noise insufficient to observe the carbonyl resonances:  $\delta/\text{ppm}$  = 59.9, 53.1, 52.8, 52.2, 49.0, 41.0, 40.8, 24.7/24.7, 22.3/22.1, 21.6/21.6, 20.8/20.7.  $^{31}\text{P}$ -NMR (202 MHz,  $\text{CD}_3\text{OD}$ ):  $\delta/\text{ppm}$  = 26.8 and 26.3. MS(ESI):  $m/z$  = 340.3  $[\text{M}+\text{H}]^+$  calculated for  $\text{C}_{12}\text{H}_{26}\text{N}_3\text{O}_6\text{P}$ .

NMR spectra:

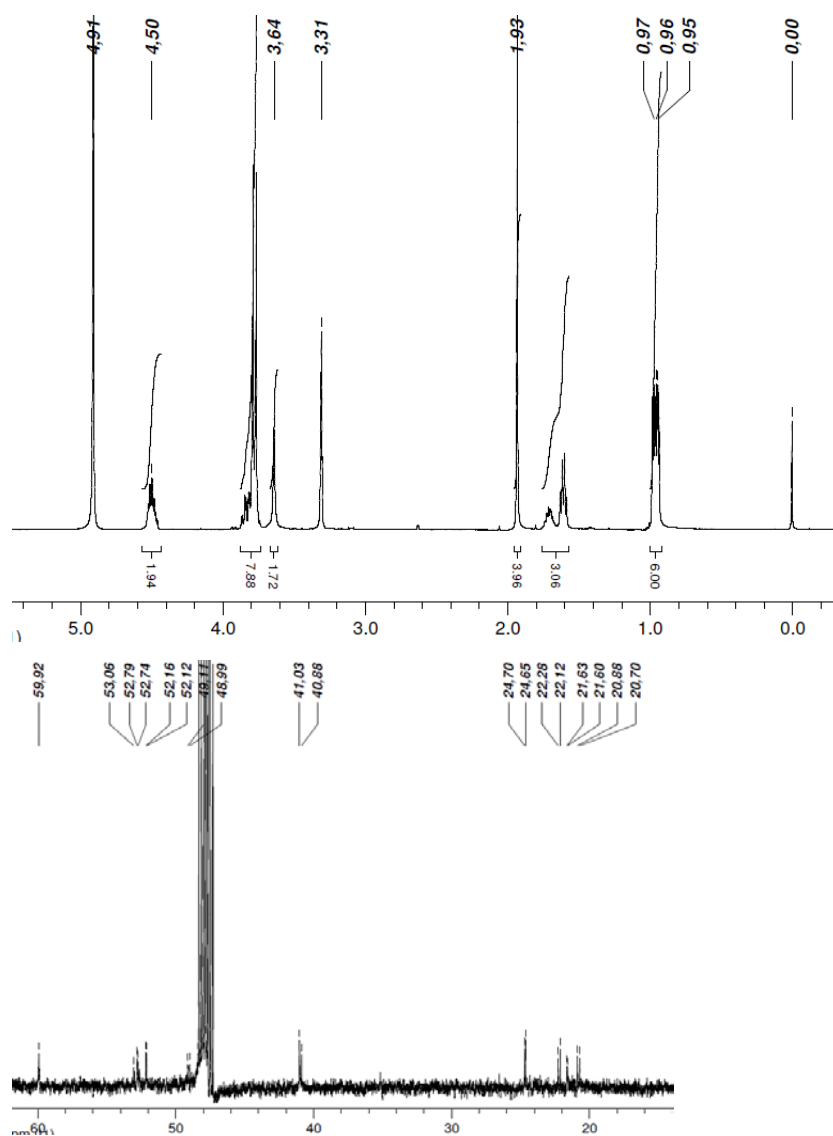

### Synthesis of compound **6**

The dimethyl ester **20** (82 mg, 205  $\mu$ mol) was dissolved in an aqueous solution of NaOH (10% NaOH, 1 ml, 250  $\mu$ mol). The solution was stirred at 25  $^{\circ}$ C over night, diluted with H<sub>2</sub>O (3 ml) and purified by preparative reversed phase HPLC (column C: isocratic 0.1% formic acid in H<sub>2</sub>O). The two diastereomers of **6** (**6a**  $t_R$  = 14 min, **6b**  $t_R$  = 18 min) were separated and after lyophilisation isolated as white solids (9 mg and 7 mg, respectively). **6a**: <sup>1</sup>H NMR (500 MHz, D<sub>2</sub>O):  $\delta$ /ppm = 4.30 (dd,  $J$  = 8.4 Hz, 6.1 Hz, 1H; H $\alpha$  Leu), 4.11 (ddd,  $J$  = 16.7 Hz, 9.1 Hz, 3.5 Hz, 1H; H $\alpha$  Ser<sup>P</sup>), 3.79 (ddd,  $J$  = 11.9 Hz, 6.1 Hz, 3.6 Hz, 1H; H $\beta$  Ser<sup>P</sup>), 3.75 (d,  $J$  = 16.4 Hz, 1H; H $\alpha$  Gly), 3.71 (d,  $J$  = 16.2 Hz, 1H; H $\alpha$  Gly), 3.56 (ddd,  $J$  = 12.4 Hz, 9.6 Hz, 3.9 Hz, 1H; H $\beta$  Ser<sup>P</sup>), 3.41 (d,  $J$  = 10.5 Hz, 3H; OCH<sub>3</sub>), 1.57–1.48 (m, 3H; H $\gamma$ / $\beta$  Leu), 0.80 (d,  $J$  = 6.0 Hz, 3H; H $\delta$  Leu), 0.76 (d,  $J$  = 5.9 Hz, 3H; H $\delta$

Leu).  $^{13}\text{C}$  NMR (126 MHz,  $\text{D}_2\text{O}$ ):  $\delta/\text{ppm}$  = 174.5, 167.2, 60.7 (d,  $J$  = 8.3 Hz), 53.0, 52.2 (d,  $J$  = 5.8 Hz), 49.5 (d,  $J$  = 143 Hz), 40.6, 40.2, 24.5, 22.3, 20.8.  $^{31}\text{P}$ -NMR (202 MHz,  $\text{D}_2\text{O}$ ):  $\delta/\text{ppm}$  = 18.5. LC-MS (column A):  $t_{\text{R}}$  = 8.8 min (isocratic 0.1% formic acid in  $\text{H}_2\text{O}$ ). HRMS (ESI):  $m/z$  = 326.1481 calculated for  $\text{C}_{11}\text{H}_{26}\text{N}_3\text{O}_6\text{P}^+$ , found: 326.1469. **6b**:  $^1\text{H}$  NMR (500 MHz,  $\text{D}_2\text{O}$ ):  $\delta/\text{ppm}$  = 4.28 (dd,  $J$  = 9.0 Hz, 5.1 Hz, 1H;  $\text{H}_\alpha$  Leu), 4.11 (ddd,  $J$  = 16.9 Hz, 9.3 Hz, 3.5 Hz, 1H;  $\text{H}_\alpha$  Ser<sup>P</sup>), 3.75 (ddd,  $J$  = 11.6 Hz, 6.5 Hz, 3.6 Hz, 1H;  $\text{H}_\beta$  Ser<sup>P</sup>), 3.71 (d,  $J$  = 16.7 Hz, 1H;  $\text{H}_\alpha$  Gly), 3.68 (d,  $J$  = 16.7 Hz, 1H;  $\text{H}_\alpha$  Gly), 3.51 (ddd,  $J$  = 12.4 Hz, 9.6 Hz, 3.9 Hz, 1H;  $\text{H}_\beta$  Ser<sup>P</sup>), 3.37 (d,  $J$  = 10.4 Hz, 3H;  $\text{OCH}_3$ ), 1.55-1.42 (m, 3H;  $\text{H}_\gamma/\beta$  Leu), 0.77 (d,  $J$  = 5.7 Hz, 3H;  $\text{H}_\delta$  Leu), 0.73 (d,  $J$  = 5.6 Hz, 3H;  $\text{H}_\delta$  Leu).  $^{13}\text{C}$  NMR (126 MHz,  $\text{D}_2\text{O}$ ):  $\delta/\text{ppm}$  = 174.4 (d,  $J$  = 4.9 Hz), 167.1, 60.7 (d,  $J$  = 8.1 Hz), 52.9, 52.3 (d,  $J$  = 5.9 Hz), 49.4 (d,  $J$  = 143 Hz), 40.5, 40.2, 24.4, 22.3, 20.7.  $^{31}\text{P}$ -NMR (202 MHz,  $\text{D}_2\text{O}$ ):  $\delta/\text{ppm}$  = 18.7. RP-HPLC column B:  $t_{\text{R}}$  = 10.2 min (isocratic 0.1% formic acid in  $\text{H}_2\text{O}$  until 10 min, then linear gradient up to 10%  $\text{CH}_3\text{CN}$  in the next 5 minutes). HRMS (ESI):  $m/z$  = 326.1481 calculated for  $\text{C}_{11}\text{H}_{26}\text{N}_3\text{O}_6\text{P}^+$ , found: 326.1479.

NMR spectra of **6a**:

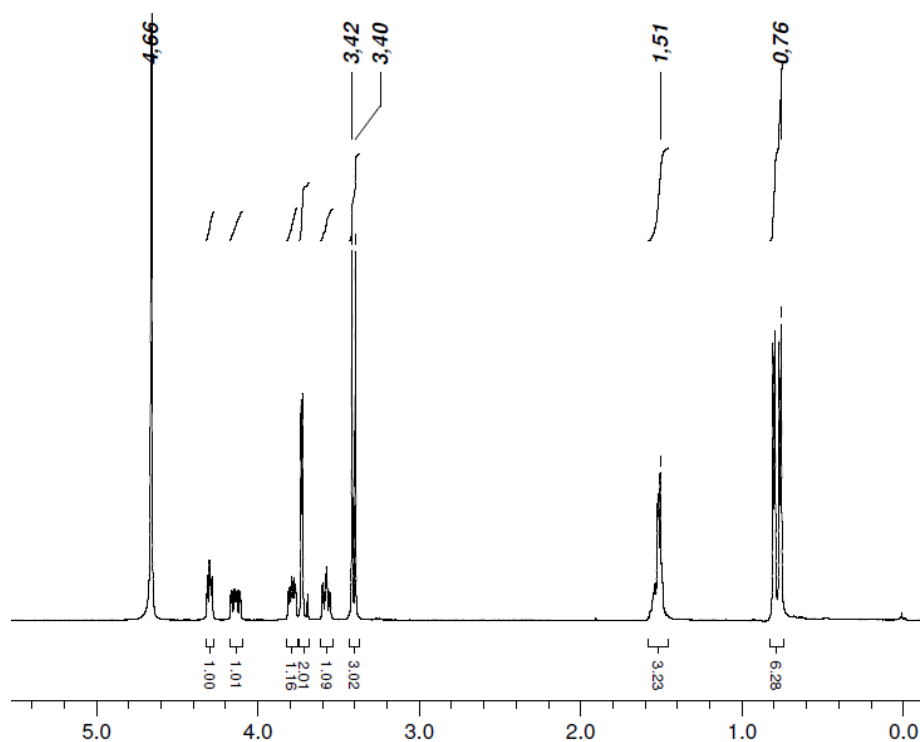

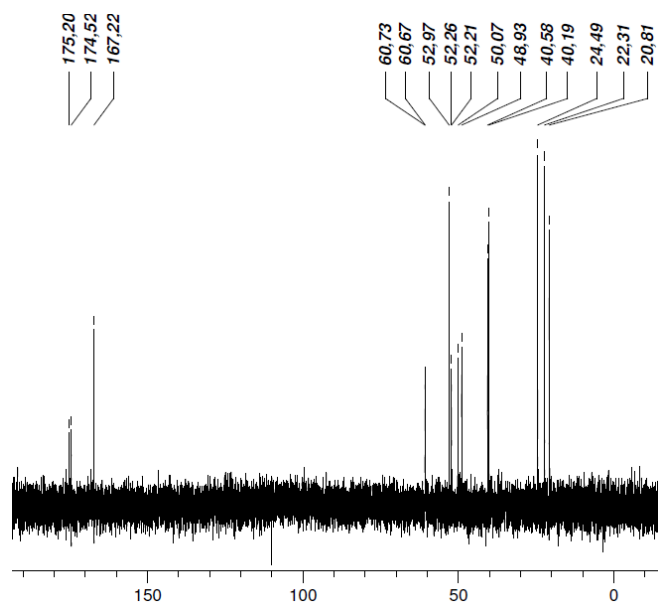

NMR spectra of **6b**:

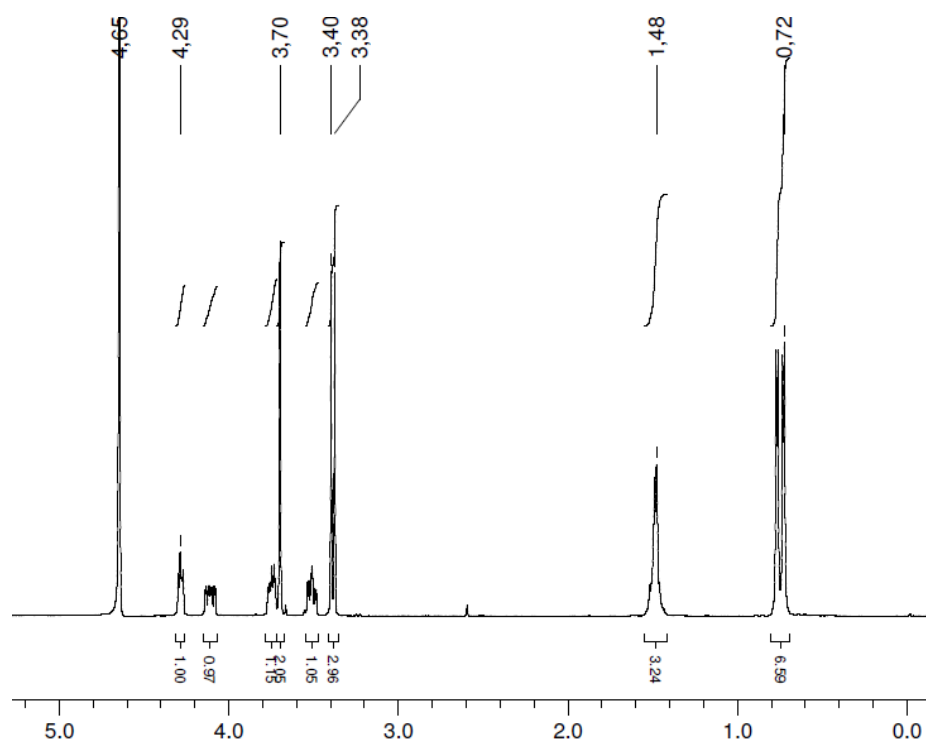

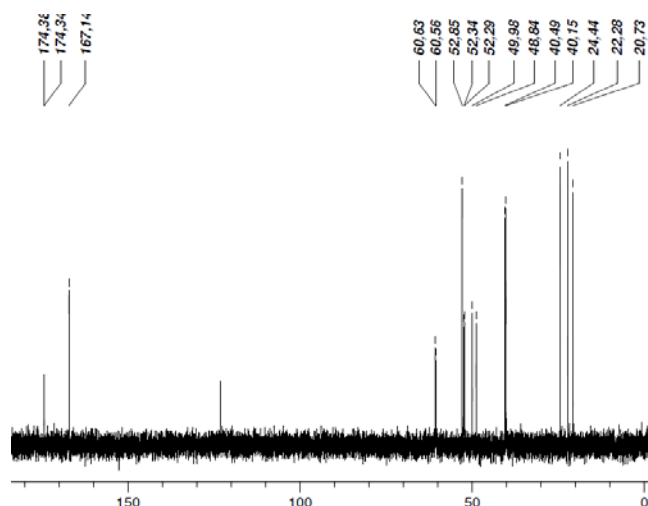

### Agar diffusion bioassays

Solid agar diffusion assays were used to assess antimicrobial activity. The bacterial cultures were grown overnight in LB media at 30 °C (*B. subtilis*) or 37 °C (*E. coli*). Cultures of *B. subtilis* were diluted with M9 media to an OD600 value close to 0.3. Cultures of *E. coli* were centrifuged. The cells were resuspended in M9 media to reach an OD600 value of 0.3. 400 µl of these mixtures were mixed with 5 ml of molten M9 minimal media containing 0.5% agar. This mixture was placed onto solidified M9 minimal media, containing 1.5% agar, on plates (9 cm diameter). Aqueous solutions of the investigated substances (5 - 10 µl, 10 mM) were absorbed on a filter disc. These were placed on the plate and the plates were incubated at 30 °C (*B. subtilis*) or 37 °C (*E. coli*) for 12 hours. Pictures were taken using a “Bucket of Light”.<sup>6</sup>

#### *Additional agar diffusion assays for E. coli:*

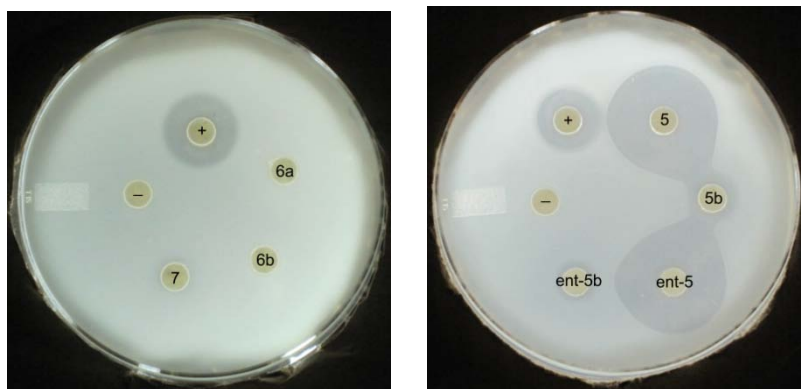

(-) negative control (water), (+) positive control (ampicillin), compounds **6a**, **6b**, **7** (methyl acetylphosphonate), **5**, **5b**, **ent-5**, **ent-5b**.

*Agar diffusion assays for B. subtilis:*

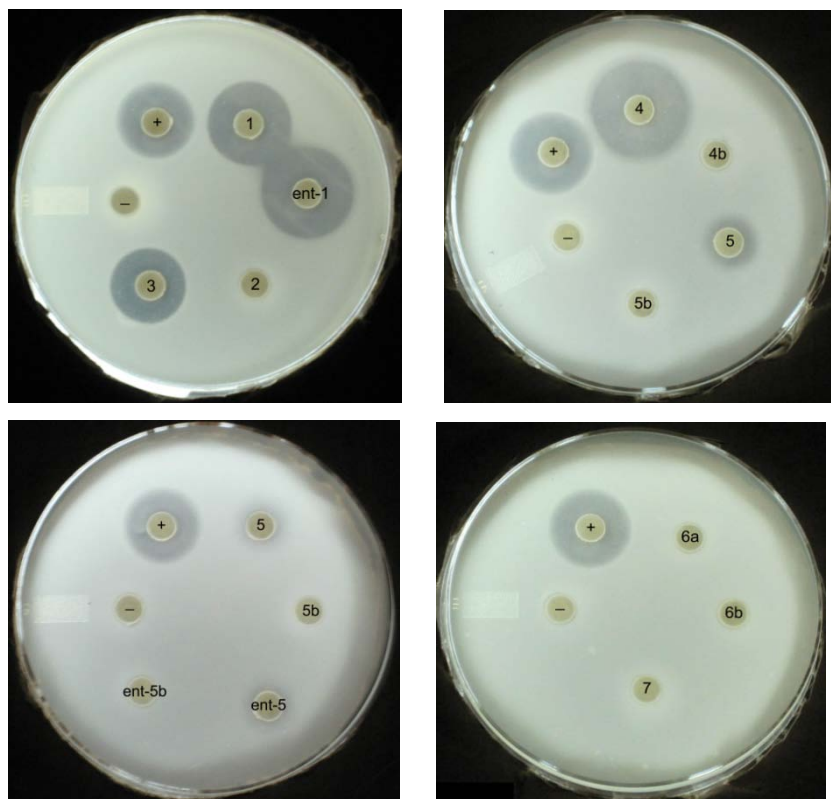

(-) negative control (water), (+) positive control (erythromycin), compounds **1**, **ent-1**, **2**, **3**, **4**, **4b**, **5**, **5b**, **ent-5**, **ent-5b**, **6a**, **6b**, **7** (methyl acetylphosphonate),.

**Liquid broth growth inhibition assays**

Liquid broth growth inhibition assays were performed in 48-well plates. An overnight culture of *E. coli* in LB media was diluted with M9 and LB media to an OD<sub>600</sub> value of 0.1. The culture containing 10% LB and 90% M9 were incubated for 5 h with different amounts of the compounds **1-5**. IC<sub>50</sub> values were defined as the concentration required to reduce the growth to 50% of the control. The growth was followed by measuring absorbance at 600 nm (OD<sub>600</sub>).

Fit for compound **1** (left,  $IC_{50} = 180 \mu M$ ) and **ent-1** (right,  $IC_{50} = 300 \mu M$ ):

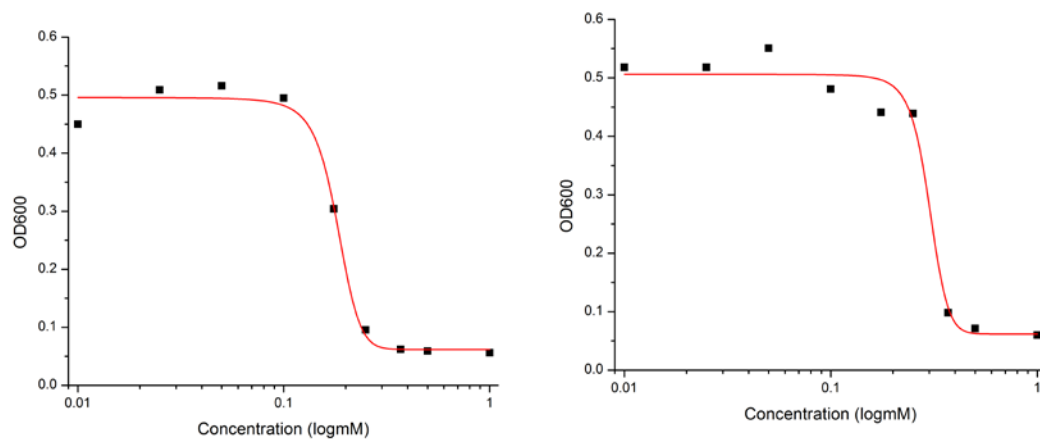

Fit for compound **5** (left,  $IC_{50} = 20 \mu M$ ) and **5b** (right,  $IC_{50} = 120 \mu M$ ):

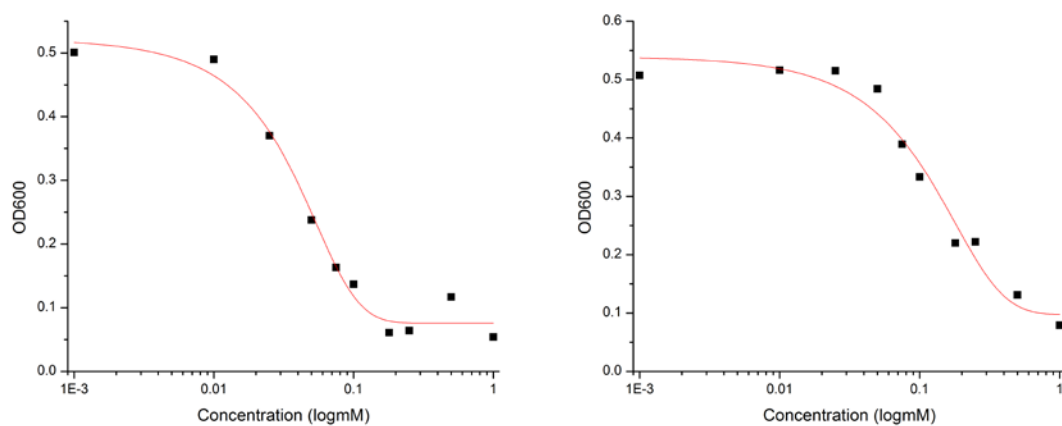

Fit for compound **ent-5** (left,  $IC_{50} = 30 \mu M$ ) and **ent-5b** (right,  $IC_{50} = 180 \mu M$ ):

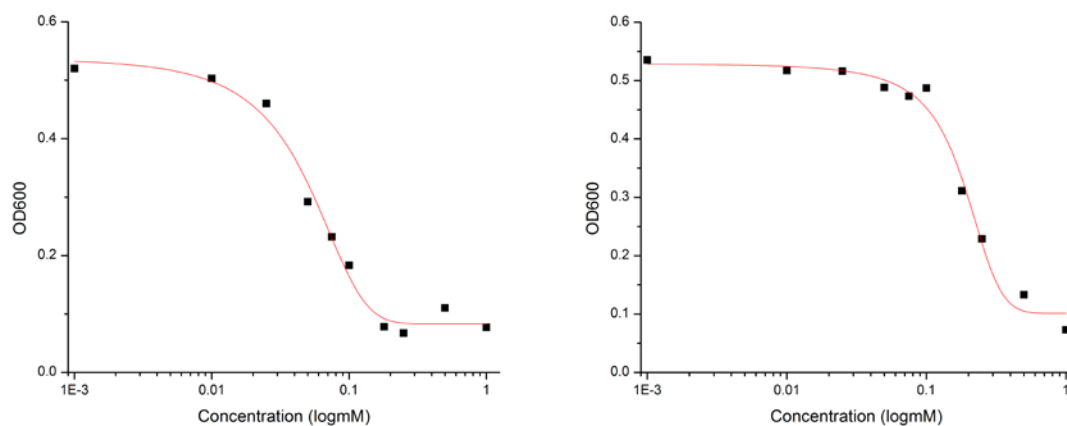

## References

1. J. T. Witteck, W. Ni, B. M. Griffin, A. C. Eliot, P. M. Thomas, N. L. Kelleher, W. W. Metcalf and W. A. van der Donk, *Angew. Chem. Int. Ed.*, 2007, **46**, 9089-9092.
2. Y. Luo, G. Evindar, D. Fishlock and G. A. Lajoie, *Tetrahedron Lett.*, 2001, **42**, 3807-3809.
3. R. C. Corcoran and J. M. Green, *Tetrahedron Lett.*, 1990, **31**, 6827-6830.
4. D. Seebach, R. Charczuk, C. Gerber, P. Renaud, H. Berner and H. Schneider, *Helv. Chim. Acta*, 1989, **72**, 401-425.
5. J.-H. Lee, B. Bae, M. Kuemin, B. Circello, W. W. Metcalf, S. K. Nair and W. A. van der Donk, *Proc. Natl. Acad. Sci. U.S.A* in press
6. J. S. Parkinson, *Methods Enzymol.*, 2007, **423**, 432-435.
